# Supplementary material for: Psychometric properties of the Patient Reported Outcomes, Burdens and Experiences (PROBE) questionnaire
Source: PubMed Central journal article supplement (PMC6089314; doi:10.1136/bmjopen-2018-021900), 2018-08-08
Supplement: bmjopen-2018-021900.draft_revisions.pdf [file bmjopen-2018-021900.draft_revisions.pdf]

# BMJ Open

BMJ Open is committed to open peer review. As part of this commitment we make the peer review history of every article we publish publicly available.

When an article is published we post the peer reviewers' comments and the authors' responses online. We also post the versions of the paper that were used during peer review. These are the versions that the peer review comments apply to.

The versions of the paper that follow are the versions that were submitted during the peer review process. They are not the versions of record or the final published versions. They should not be cited or distributed as the published version of this manuscript.

BMJ Open is an open access journal and the full, final, typeset and author-corrected version of record of the manuscript is available on our site with no access controls, subscription charges or pay-per-view fees (<http://bmjopen.bmj.com>).

If you have any questions on BMJ Open's open peer review process please email [info.bmjopen@bmj.com](mailto:info.bmjopen@bmj.com)

# BMJ Open

## Psychometric properties of the Patient Reported Outcomes Burdens and Experiences (PROBE) Questionnaire

|                               |                                                                                                                                                                                                                                                                                                                                                                                                                                                                                                                                                                                                                                                                                                                                                                                                                                                                                             |
|-------------------------------|---------------------------------------------------------------------------------------------------------------------------------------------------------------------------------------------------------------------------------------------------------------------------------------------------------------------------------------------------------------------------------------------------------------------------------------------------------------------------------------------------------------------------------------------------------------------------------------------------------------------------------------------------------------------------------------------------------------------------------------------------------------------------------------------------------------------------------------------------------------------------------------------|
| Journal:                      | <i>BMJ Open</i>                                                                                                                                                                                                                                                                                                                                                                                                                                                                                                                                                                                                                                                                                                                                                                                                                                                                             |
| Manuscript ID                 | bmjopen-2018-021900                                                                                                                                                                                                                                                                                                                                                                                                                                                                                                                                                                                                                                                                                                                                                                                                                                                                         |
| Article Type:                 | Research                                                                                                                                                                                                                                                                                                                                                                                                                                                                                                                                                                                                                                                                                                                                                                                                                                                                                    |
| Date Submitted by the Author: | 26-Jan-2018                                                                                                                                                                                                                                                                                                                                                                                                                                                                                                                                                                                                                                                                                                                                                                                                                                                                                 |
| Complete List of Authors:     | Chai-Adisaksopha, Chatree; McMaster University, Medicine; McMaster University, Health Research Methods, Evidence, and Impact<br>Skinner, Mark; Institute for Policy Advancement Ltd<br>Curtis, Randall; Factor VIII Computing<br>Frick, Neil; National Hemophilia Foundation<br>Nichol, Michael; University of Southern California Sol Price School of Public Policy<br>Noone, Declan; Irish Haemophilia Society<br>O'Mahony, Brian ; Irish Haemophilia Society; Trinity College Dublin<br>Page, David; Canadian Hemophilia Society<br>Stonebraker, Jeffrey ; North Carolina State University Poole College of Management<br>Thabane, Lehana; McMaster University, Health Research Methods, Evidence, and Impact; St Joseph's Healthcare, Biostatistics Unit<br>Crowther, Mark; McMaster University, Canada<br>Iorio, Alfonso; McMaster University, Clinical Epidemiology and Biostatistics |
| Keywords:                     | validity, hemophilia, patient reported outcome, quality of life, questionnaire                                                                                                                                                                                                                                                                                                                                                                                                                                                                                                                                                                                                                                                                                                                                                                                                              |
|                               |                                                                                                                                                                                                                                                                                                                                                                                                                                                                                                                                                                                                                                                                                                                                                                                                                                                                                             |

SCHOLARONE™  
Manuscripts

1  
2  
3  
4 Psychometric properties of the Patient Reported Outcomes Burdens and Experiences  
5  
6 (PROBE) Questionnaire  
7  
8  
9

10  
11 Authors  
12

13 Chatree Chai-Adisaksopha<sup>1,2</sup>, Mark Skinner<sup>3</sup>, Randall Curtis<sup>4</sup>, Neil Frick<sup>5</sup>, Michael B.  
14 Nichol<sup>6</sup>, Declan Noone<sup>7</sup>, Brian O'Mahony<sup>7,8</sup>, David Page<sup>9</sup>, Jeffrey Stonebraker<sup>10</sup>, Lehana  
15 Thabane<sup>2,11</sup>, Mark Crowther<sup>1,2</sup> and Alfonso Iorio<sup>1,2</sup>  
16  
17  
18  
19  
20

21 **Authors' affiliations**  
22

23  
24 <sup>1</sup>Department of Medicine, McMaster University, Hamilton, ON, Canada  
25

26  
27 <sup>2</sup>Department of Health Research Methods, Evidence, and Impact, McMaster University,  
28 Hamilton, Canada  
29

30  
31  
32 <sup>3</sup>Institute for Policy Advancement Ltd, Washington, DC, US  
33

34  
35 <sup>4</sup>Factor VIII Computing, Berkeley, US  
36

37  
38 <sup>5</sup>National Hemophilia Foundation, New York, US  
39

40  
41 <sup>6</sup>Sol Price School of Public Policy, University of Southern California, Los Angeles, US  
42

43  
44 <sup>7</sup>Irish Haemophilia Society, Dublin, Ireland  
45

46  
47 <sup>8</sup>Trinity College Dublin, Dublin, Ireland  
48

49  
50 <sup>9</sup>Canadian Hemophilia Society, Montreal, Canada  
51

52  
53 <sup>10</sup>Poole College of Management, North Carolina State University, Raleigh, US  
54

55  
56 <sup>11</sup>Biostatistics Unit, St Joseph's Healthcare, Hamilton, Canada  
57  
58  
59  
60

1  
2  
3 **Sources of financial support:** PROBE is an independent investigator led research project  
4  
5 with grant / research support from: Baxalta, now part of Shire; Bayer; Bioverativ; CSL  
6  
7 Behring; Novo Nordisk, Roche and Sobi with administrative support provided by the US  
8  
9 National Hemophilia Foundation.  
10

11  
12 **Acknowledgements:** The PROBE investigators wish to thank the hemophilia patient  
13  
14 organizations that have participated in the project and two anonymous reviewers for  
15  
16 significant contribution to the quality and clarity of the final version of this manuscript,  
17  
18 including some key methodological references.  
19  
20

21  
22 **Running title:** Psychometric properties of PROBE  
23

24 **Keywords:** validity, hemophilia, patient reported outcome, quality of life, questionnaire  
25

26  
27 **Word count:** Abstract 245, Text 3715  
28

29 **Table and Figure:** 6 tables, 2 figures  
30

31  
32 **Correspondence:**  
33

34 Mark W. Skinner  
35

36 1155 23rd Street NW #3A  
37

38 Washington DC 20037 USA  
39

40 Email: mskinnerdc@gmail.com  
41

42 Tel.: +1-202-253-8342  
43

44 Fax: +1-202-296-1352  
45  
46  
47  
48  
49  
50  
51  
52  
53  
54  
55  
56  
57  
58  
59  
60

## Abstract

**Objective:** To assess the psychometric properties of The Patient Reported Outcomes, Burdens and Experiences (PROBE) questionnaire.

**Methods:** This study was a cross-sectional, multi-national study. Participants were enrolled if they were 10 years or older and patients with hemophilia A or B or people without bleeding disorder. Participants were invited through non-governmental patient organizations in 21 countries between 04/08/2015 and 12/28/2015. The following psychometric properties: missing data, floor and ceiling effects, exploratory factor analysis, and internal consistency reliability were examined. A PROBE Score was derived and assessed for its convergent and known groups validity.

**Results:** The study analyzed the data on 916 participants with median age of 37.0 (interquartile range 27.0 to 48.0) years, 74.8% male. In the domain assessing patient reported outcomes, more than 15% of participants presented a ceiling effect for all items but two, and a floor effect for one item. Factor analysis identified two factors explaining the majority of the variance. Cronbach's alpha coefficient indicated good internal consistency reliability (0.84). PROBE items showed moderate to strong correlations with corresponding EQ-5D-5L domains. The PROBE Score has a strong correlation ( $r=0.67$ ) with EQ-5D-5L utility index score. The PROBE Score has a known groups validity among various groups.

**Conclusions:** The results of this study suggest that PROBE is a valid questionnaire for evaluating PROs in people with hemophilia, as well as control population. The known-group property of PROBE will allow its use in future clinical trials, longitudinal studies, health technology assessment studies, routine clinical care or registries.

1  
2  
3 Trial registration: NCT02439710  
4  
5  
6  
7  
8  
9  
10  
11  
12  
13  
14  
15  
16  
17  
18  
19  
20  
21  
22  
23  
24  
25  
26  
27  
28  
29  
30  
31  
32  
33  
34  
35  
36  
37  
38  
39  
40  
41  
42  
43  
44  
45  
46  
47  
48  
49  
50  
51  
52  
53  
54  
55  
56  
57  
58  
59  
60

For peer review only

### Strengths and limitation

- The PROBE questionnaire includes items assessing comprehensive outcomes that are relevant to patients.
- The psychometric analyses demonstrate the validity and internal consistency of the Patient Reported Outcomes Burdens and Experiences (PROBE) Questionnaire.
- This study was conducted in a large sample of patients with hemophilia and participant without bleeding disorders from multiple countries.
- The responsiveness of the measurement was not investigated in this current study.

## Background

Hemophilia is an inherited X-linked recessive bleeding disorder characterized by the reduction or absence of blood coagulation factor (F) VIII (hemophilia A) or FIX (hemophilia B).

Severity of hemophilia is categorized by the baseline factor level (mild; factor level  $>0.05$  to  $<0.40$  IU/ml, moderate; factor level  $0.01$ - $0.05$  IU/ml and severe; factor level  $<0.01$  IU/ml) <sup>1</sup>.

Coagulation deficiency renders patients prone to abnormal bleeding. Symptoms of hemophilia vary depending on the severity of hemophilia, mechanism and severity of injury and affected organs. People with hemophilia (PWH) commonly present with hemarthrosis, gastrointestinal or genitourinary tract bleeding, intramuscular bleeding or intracranial bleeding <sup>2-6</sup>.

Life expectancy of PWH substantially improved with factor replacement therapy <sup>7</sup>. However, PWH who live longer encounter more chronic complications from both hemophilia-related conditions and degenerative diseases that occur in normal population. Chronic degenerative joint diseases are found in 90% of PWH by the second or third decade of life <sup>8</sup>. PWH with recurrent joint bleeding suffer from chronic pain, limitation of range of motion and disability <sup>9</sup>. Human immunodeficiency virus (HIV) and hepatitis C virus (HCV) infections are prevalent among PWH prior to the implementation of intensive viral screening in plasma-derived factor concentrates and the use of recombinant factor concentrates <sup>10</sup>. One of the major consequences of chronic HCV infection is cirrhosis, resulting in end-stage liver disease which is the most common cause of death in PWH <sup>10</sup>. Moreover, 43% of cancers diagnosed in PWH were related to HCV infection <sup>11</sup>. Aged PWH are also affected by cardiovascular diseases. A retrospective study using an administrative database of 3,422 males with hemophilia reported a prevalence of ischemic heart disease of 15% in PWH older than 60 years <sup>12</sup>. Risk factors of cardiovascular disease in PWH are equivalent to patients without hemophilia <sup>13</sup>. These long-



1  
2  
3 term complications of hemophilia directly impact on health-related quality of life (HRQoL) in  
4  
5 PWH<sup>14</sup>.

6  
7  
8 Patient reported outcomes (PROs) are defined as any reports of status of patients' health  
9  
10 conditions that come directly from the patients without interpretation by clinicians or anyone  
11  
12 else<sup>15</sup>. PROs provide data that obtained from patients including symptoms, frequency of  
13  
14 symptoms, severity of symptoms, impact of disease on daily life, disability and perfection of  
15  
16 patients toward diseases and treatments<sup>16</sup>. Thus, PROs have been increasingly valued by  
17  
18 researchers, stakeholders, policy makers and health technology assessment agencies<sup>17-20</sup>.

19  
20  
21 Recently, the International Society for Pharmacoeconomic and Outcomes Research (ISPOR)  
22  
23 Clinical Outcome Assessment Emerging Good Practices Task Force published the Patient-  
24  
25 reported outcome and observer-reported outcome assessment in rare disease clinical trials<sup>21</sup>.

26  
27 This report demonstrated the challenges of assessing patient-reported outcome in rare  
28  
29 diseases, for instance, heterogeneity of disease severity and patient experience or  
30  
31 understanding treatment benefit from patients' perspective. Hemophilia, which is a rare  
32  
33 bleeding disorder, exhibits various disease severity. Moreover, patients' perspective on their  
34  
35 symptom may be dissimilarly influenced by age, co-morbid disease, inhibitor status, current  
36  
37 treatment or progression of symptoms. Therefore, a hemophilia-specific PRO measure is  
38  
39 essential for assessing outcomes in this patient population.

40  
41  
42 The Patient Reported Outcomes, Burdens and Experiences (PROBE) Project is a patient-lead  
43  
44 research initiative. The main objectives of the PROBE Project are to develop a standardised  
45  
46 PRO questionnaire and to develop a dedicated research network to generate and continuously  
47  
48 update PROBE reference data. The rationale, research group establishment and PRO  
49  
50 questionnaire development<sup>22</sup> has been previously reported. The feasibility study of the  
51  
52  
53  
54  
55  
56  
57  
58  
59  
60

1  
2  
3 PROBE questionnaire was conducted in collaborations with non-governmental hemophilia  
4 patient organizations (NGOs) in 17 countries. Previously reported results demonstrated that  
5 the burden of the PROBE questionnaire implementation was minimal and the time required to  
6 complete the questionnaire was less than 15 minutes for over 75% of participants<sup>22</sup>. The  
7 objective of the current study is to assess the psychometric properties of the PROBE  
8 questionnaire.  
9  
10  
11  
12  
13  
14  
15  
16  
17  
18  
19  
20  
21  
22  
23  
24  
25  
26  
27  
28  
29  
30  
31  
32  
33  
34  
35  
36  
37  
38  
39  
40  
41  
42  
43  
44  
45  
46  
47  
48  
49  
50  
51  
52  
53  
54  
55  
56  
57  
58  
59  
60

## Methods

### Participant enrollment and study procedure

This study was designed as a cross-sectional assessment. Participants were enrolled through NGOs from 1/27/2016 to 2/23/2017. Participants were recruited if they were more than 10 years old and they were either PWH (hemophilia A or hemophilia B) or controls (participants without bleeding disorders). Participants were instructed to complete the questionnaire for themselves, and parents or caregivers not to answer for their child. Although collected as part of the study, participants who identified themselves as carriers of hemophilia were excluded from the analysis. Patients with other bleeding disorders or an unknown bleeding disorder were also excluded.

The participating NGOs distributed the PROBE questionnaires through mail, e-mail, in-person meetings or a combination of methods. The PROBE questionnaire was available in 18 languages with localized language versions in both paper- and web-based format.

### Ethical approval

Patients' identifier or personal information were not collected as part of the study. Data were collected as anonymous individuals, and study data were transferred and stored at McMaster University. Ethical approval was obtained from the Hamilton Integrated Research Ethics Boards. Additional local review ethical board approval was obtained when requested by the local regulation.

### PROBE questionnaire

The detail of questionnaire development and feasibility study was described elsewhere<sup>22</sup>. The PROBE questionnaire is organized in 4 sections, comprising 29 questions. Sections are numbered following the order of presentation in the questionnaire. PROBE PRO domains are

covered in Section II. The questions in Section I and III do not cover PRO domains. Only PWH are expected to complete Section III, whereas every participant completes Sections I, II and IV. Section I contains 7 questions pertaining to demographic data (country, gender, diagnosis of hemophilia or absence of a bleeding disorder, year of birth, body weight, age first started and finished school, marital status and children). Section II contains 9 questions pertaining to PROs, including general health issues, use of mobility aids or assistive devices, pain (including acute, chronic, and pain medications), daily activities, current work or student status, surgeries or procedures, and co-morbid diseases. Section III contains 12 questions pertaining to clinical aspects of hemophilia (severity of hemophilia, inhibitor status, bleeding history, hemophilia care, treatment regimen, target joints, joint bleeding, range of motion and life- or limb-threatening bleeds). Section IV contains the EuroQol five dimension 5-level instrument (EQ-5D-5L)<sup>23</sup>, consisting of questions regarding mobility, self-care, usual activities, pain or discomfort and anxiety or depression, and the EuroQol visual analog scale (EQ-VAS) of global health<sup>23</sup> were incorporated in the PROBE questionnaire with permission.

### **Item scaling and PROBE score calculation**

PROs were evaluated only in Section II. The calculation of the PROBE score was based on multiattribute value functions<sup>24,25</sup>. The assessed scores ( $X_i$ ) were converted to returns-to-scale score ( $V_i X_i$ ), given that  $0 \leq V_i(X_i) \leq 1$ . Q.8 which had a dichotomous response (0 = no, 1 = yes) produce dichotomous score of 0 and 1. Two questions (Q.10 and Q.15) asked for frequency of the use of pain medication(s) and number of surgeries or invasive procedures. The 6- and 7-level Likert scales from these two questions were converted to a returns-to-scale score, ranging from 0 to 1. The number of days absent from work or school (Q.14) was converted to returns-to-scale score by dividing by 366. Questions regarding mobility aids,

1  
2  
3 acute pain, chronic pain and co-morbid diseases (Q.9, Q.11, Q.12, Q.13 and Q.16) had  
4 multiple choices. The scales for these items were calculated based on the cumulative number  
5 of choices checked. We apply weight for subitems in each question (if needed). The final  
6 score was calculated by summing all of the 11 items scores from the 9 questions using  
7 additive value function and then scaled so the PROBE Score ranged from 0 to 1 (higher value  
8 indicates better health status).  
9

## 10 11 12 13 14 15 16 17 **Data analyses**

### 18 19 20 **Descriptive statistics**

21  
22 Demographic data of study participants were summarized using mean with corresponding  
23 standard deviation (SD) or median and quartile range as appropriate. Categorical data were  
24 summarized using numbers and percentages. Participants who did not respond in Q.3 (disease  
25 status; hemophilia A, hemophilia B, hemophilia carrier, other bleeding disorders or no  
26 bleeding disorder) were excluded from the analysis. An item distribution analysis to evaluate  
27 the proportion of missing data was performed. Floor and ceiling effects were evaluated by the  
28 proportion of respondents with scores at floor (minimum score) and ceiling (maximum score),  
29 respectively.  
30  
31  
32  
33  
34  
35  
36  
37  
38  
39

### 40 41 42 **Psychometric analyses**

43 Face and content validity were assessed and reported previously<sup>22</sup>. Test-retest reliability  
44 analyses of the PROBE questionnaire were reported elsewhere<sup>26</sup>. In the current study, the  
45 following psychometric analyses were carried out.  
46  
47  
48

#### 49 50 *Factor analysis*

51  
52 An exploratory factor analysis of 9 questions, pertaining to the PROs (Section II). Principal  
53 component factor analysis was conducted with oblique rotation method was performed.  
54  
55  
56  
57  
58  
59  
60

1  
2  
3 Investigators made *a priori* decision to retain all factors that had eigenvalues of 1.0 or greater,  
4 according to Kaiser criterion<sup>27</sup>. A scree plot was generated. The percentage of variance on the  
5 items that were explained by the factors was evaluated. Higher percentage indicated strong  
6 influence of the factors. The regression coefficients (factor loadings) of the item responses on  
7 the retaining factors after factor rotation was calculated.  
8  
9

#### 10 11 12 13 14 15 *Internal consistency reliability*

16  
17 An analysis to confirm the precision of the scale based on the intercorrelations of the items  
18 evaluating the same construct was conducted. We hypothesized that the questions asking  
19 about pain and the use of medications (Q.10-Q.13) were correlated. Cronbach's alpha was  
20 used to determine the correlation between items. Cronbach's alpha coefficient greater than 0.7  
21 was considered to indicate acceptable reliability<sup>28</sup>.  
22  
23  
24  
25  
26  
27

#### 28 29 *Convergent validity*

30  
31 The convergent validity of the items in the same construct with the existing, standardised  
32 questionnaire were assessed. Specifically, we hypothesized that the items asking about the use  
33 of mobility aids and assistive devices correlated with the mobility domain of EQ-5D-5L; the  
34 items asking about the use of pain medication, acute and chronic pain (Q.10, Q.11 and Q.12)  
35 correlated with pain and discomfort domain of EQ-5D-5L; the items asking about activities of  
36 daily living (Q.13) correlated with the self-care and usual activity domains of EQ-5D-5L. The  
37 correlation between EQ-5D-5L utility index score and the PROBE Score was assessed.  
38  
39  
40  
41  
42  
43  
44  
45  
46  
47  
48  
49  
50  
51  
52  
53  
54  
55  
56  
57  
58  
59  
60  
Correlation coefficient ( $r$ ) was interpreted as the followings,  $r$  0.20-0.39; weak correlation;  $r$   
0.40-0.59, moderate correlation;  $r$  0.60-0.79, strong correlation; and  $r$  0.80-1.00, very strong  
correlation<sup>29</sup>.

#### 61 62 63 64 65 66 67 68 69 70 *Known groups validity*

1  
2  
3 The ability of the PROBE questionnaire to determine the differences between known  
4 subgroups was assessed. Participants were classified into groups, according to information  
5 collected in Section III, as diagnosis (hemophilia or non-hemophilia), severity of hemophilia  
6 (mild, moderate or severe), current inhibitor status (yes or no), number of bleeds in the past  
7 year (categorical variable), bleed in the past two weeks (yes, no), presence of target joint (yes,  
8 no), limitation of range of motion of the joints (yes, no) and life- or limb-threatening bleeding  
9 in the past year (yes, no). The PROBE Scores were compared between subgroups using t-test  
10 or one-way ANOVA for the univariate analysis, as appropriate. A priori hypotheses included  
11 PWH (as compared to participants without bleeding disorders), patients with severe  
12 hemophilia (as compared to mild and moderate hemophilia), patients with current inhibitor (as  
13 compared to those without an inhibitor), patients with greater numbers of bleeding, patients  
14 who had recent bleeding within the past 2 weeks (as compared to those without), patients with  
15 presence of target joint(s) (as compared to those without), patients who had reduced range of  
16 motion of any joints (as compared to those without) and patients who had life- or limb-  
17 threatening bleeding in the past year (as compared to those without) had worse PROBE  
18 scores. The multivariable analysis of the known group validity was conducted using a linear  
19 regression. The regression model included age and gender of participants in the analysis.  
20 Regression coefficients with corresponding 95% CI were reported. P-value less than 0.05 was  
21 considered statistically significant.  
22  
23  
24  
25  
26  
27  
28  
29  
30  
31  
32  
33  
34  
35  
36  
37  
38  
39  
40  
41  
42  
43  
44  
45  
46  
47  
48  
49  
50  
51  
52  
53  
54  
55  
56  
57  
58  
59  
60

## Results

### Participants' demographic data

Since inception, NGOs from 21 countries have participated in the PROBE project. Figure 1 demonstrates the flow of participant selection who participated in this phase of research.

There were 1287 participants who responded to the questionnaire. After excluding hemophilia carriers, other bleeding disorders and missing value, the analysis included 916 participants.

Demographic data is shown in Table 1. Median age of PWHs was lower than that of controls, 33 (quartile 1, quartile 3 of 24, 46) vs 43 (quartile 1, quartile 3 of 34, 54) years. The proportion of male participants in hemophilia group was greater than those in control group (93.7% vs 6.4%). Among hemophilia patients, most had severe hemophilia. Seventeen participants (2.6%) of PWH had an inhibitor. during study period.

### Descriptive analysis

Table 2 demonstrates item distribution and missing data. Ceiling effect greater than 15% was observed in all but one item (the use of pain medications) in Section II. Similarly, ceiling effect greater than 15% was observed in all domains of EQ-5D-5L. Floor effect greater than 15% was found in four items (problems related to health, bleeding in the past 12 months, limitation of range of motion and life- or limb-threatening bleeding). Missing data was 0% to 21.8% in Section II, 18.2% to 49.4% in Section III and 21.6% to 22.9% in Section IV. The median PROBE Score across all participants was 0.78 (mean=0.76, SD=0.16, minimum=0.26 and maximum=0.99).

### Psychometric analyses

#### *Exploratory factor analysis*



1  
2  
3 The principal component factor analysis of the 9 questions (11 items) pertaining to the PROs  
4 was carried out. The scree plot demonstrated two factors with eigenvalue greater than 1.0  
5  
6 (Figure 2). These two factors were retained for the following analyses. Cumulatively, the  
7  
8 combination of two factors explained 50.6% of the variance. Table 3 demonstrates factor  
9  
10 loadings based on two factors. The items were grouped per factor with their maximum loading  
11  
12 (bold).  
13  
14  
15

16  
17 Factor 1 appears to be the most influential, explaining 40.8% of the variance. There were 8  
18  
19 items contained in this factor (problems related to health, mobility aids or assistive devices,  
20  
21 use of pain medications, activities and interference related to acute pain, activities and  
22  
23 interference related to chronic pain, activities of daily living, and work/school life). Factor 2  
24  
25 explained 9.8% of the variance, and contained two items (joint surgery or procedure and  
26  
27 comorbid disease). All items in the each factor had acceptable factor loadings ( $r \geq 0.3$ )<sup>30</sup>.  
28  
29

### 30 31 *Internal consistency reliability*

32  
33 The internal consistency reliability was carried out using Cronbach's alpha. An analysis on  
34  
35 pain-related items was performed. The Cronbach's alpha coefficient was acceptable at 0.84.  
36  
37

### 38 39 *Convergent validity*

40  
41 Table 4 shows the correlation coefficients between PROBE items and EQ-5D-5L. The results  
42  
43 showed that Q. 3 (the use of mobility aids and assistive devices) had a moderate correlation  
44  
45 with mobility domain of EQ-5D-5L ( $r=0.42$ ). The pain and discomfort domain of EQ-5D-5L  
46  
47 had a moderate to strong correlation with most of the pain related items of the PROBE  
48  
49 questionnaire ( $r=0.55$  for pain medication, 0.42 for acute pain occurrence, 0.39 for acute pain  
50  
51 interference, 0.56 for chronic pain occurrence and 0.57 for chronic pain interference). Item  
52  
53 related to activities of daily living had a strong correlation with the self care and usual  
54  
55  
56  
57  
58  
59  
60

1  
2  
3 activities domain ( $r=0.65$  and  $0.71$ , respectively). The PROBE score had a strong correlation  
4  
5 with the EQ-5D-5L utility index score ( $r=0.67$ ).  
6  
7

### 8 *Known groups validity*

9

10 The regression coefficients of each *a priori* variable and the PROBE Score were demonstrated  
11 in Table 5. Participants without a bleeding disorder had a significantly higher PROBE Score  
12 when compared with PWH (mean score (SD),  $0.87$  ( $0.11$ ) vs  $0.71$  ( $0.16$ ),  $P<0.001$ ). PWH with  
13 mild to moderate hemophilia had a slightly higher PROBE Score (mean  $0.71$ , SD  $0.16$ ) than  
14 severe PWH (mean  $0.70$ , SD  $0.16$ ), PWH who had a greater number of bleeding episodes had  
15 a significantly lower PROBE Score when compared to those who had less frequent bleeding  
16 ( $P<0.001$ ). Patients who reported bleeding in the past two weeks had a significantly lower  
17 PROBE score (mean  $0.67$ , SD  $0.15$ ) than those without (mean  $0.76$ , SD  $0.15$ ). Patients who  
18 reported the presence of any target joints had a significantly lower PROBE score (mean  $0.68$ ,  
19 SD  $0.15$ ) when compared to those who did not (mean  $0.78$ , SD  $0.16$ ). Patients who reported  
20 three or more spontaneous joint bleeds in the past 6 months had significantly lower PROBE  
21 score (mean  $0.66$ , SD  $0.14$ ) than those who did not report (mean  $0.73$ , SD  $0.14$ ). Patients with  
22 reduced range of motion of any joints had a significantly lower PROBE score (mean  $0.68$ , SD  
23  $0.14$ ) as compared to those without (mean  $0.73$ , SD  $0.15$ ). Patients who previously had life- or  
24 limb-threatening bleeding in the past year had a significantly lower PROBE Score (mean  $0.62$ ,  
25 SD  $0.16$ ) when compared to those who did not (mean  $0.72$ , SD  $0.15$ ). Table 6 demonstrates  
26 multivariable analysis. The findings from multivariable analysis did not change much after  
27 adjusting for age and sex.  
28  
29  
30  
31  
32  
33  
34  
35  
36  
37  
38  
39  
40  
41  
42  
43  
44  
45  
46  
47  
48  
49  
50  
51  
52  
53  
54  
55  
56  
57  
58  
59  
60

## Discussion

The psychometric properties of the PROBE questionnaire have been assessed, and found that the PROBE questionnaire has a strong internal consistency, robust convergent validity and excellent differentiation properties between known groups. We believe these characteristics, jointly with the availability of country specific reference ranges and low impact on NGO resources and time required by the patients make the PROBE questionnaire a tool with great potential for efficient PROs collection in clinical and comparative effectiveness research, and for advocacy purposes.

As demonstrated by factor analysis, the core of PROBE revolves around two factors, explaining the majority of the variance in responses. The most influential factor was pain, followed by use of mobility aids or assistive device (complemented by work or school absent days), and comorbidity. No surprise these three elements explain 50% of the variance among different participants: the novelty of PROBE is summarizing the assessment of these 3 domains in a lightweight set of questions for which excellent internal consistency was demonstrated.

The convergent validity analysis showed moderate to strong correlation between PROBE and EQ-5D-5L items, with lower correlations for items concerning pain ( $r$  ranged from 0.39 to 0.57). Whereas the overall convergence with EQ-5D-5L was confirmed, and was intentionally sought to ensure maximizing external validity and efficiency for cross-disease comparisons.

The pain related questions in the PROBE questionnaire are related to different aspects (when the pain occurred..., if the pain interfered with any of following...) than EQ-5D-5L<sup>31</sup>. From this perspective, PROBE might be seen as a new hybrid PRO tool, sharing some properties of a generic and some of a disease specific tool. The total PROBE score has a strong correlation

1  
2  
3 with the utility index score of the EQ-5D-5L, both in patients ( $r=0.57$ ), and controls ( $r=0.53$ ),  
4  
5 but explores a more specific set of subdomains.  
6

7  
8 The most important result of this analysis is the demonstration of the discriminative property  
9  
10 of the PROBE questionnaire and score. In known group validity analysis, PWH had  
11  
12 significantly lower PROBE Score when compared to the control population (participants  
13  
14 without hemophilia). Patients with more frequent bleed, target joint, reduced range of motion  
15  
16 and previous life- or limb-threatening bleed were demonstrated with a lower PROBE score  
17  
18 (indicating worse health status).  
19  
20

21  
22 The investigators did not observe a significant difference of the total PROBE scores among  
23  
24 severity of disease, as well as, current inhibitor status. This outcome may be confounded by  
25  
26 bleeding phenotype and joint status. It has been shown that the presence of inhibitor has  
27  
28 negative impact on health-related quality of life in PWH<sup>32</sup>. The regression analysis in this  
29  
30 present study revealed that numbers of bleeding, presence of target joint(s) and limitation of  
31  
32 range of motion of any joints, not inhibitor status, were associated with worse health status.  
33  
34

35  
36 There have been studies that reported the negative health-related quality of life in hemophilia  
37  
38 patients with inhibitor who had poor orthopedic joint score, who had acute bleeding and who  
39  
40 had more frequent bleeding<sup>33-35</sup>. It is important to note that there are relatively a small number  
41  
42 of patients with mild-moderate diseases (8.8% and 14.3%, respectively) and those with current  
43  
44 inhibitors (4.1%) in this study. The association between inhibitor status and health status of  
45  
46 PWH warrant further studies with adequate power.  
47  
48

49  
50 The PROBE Project has several strengths. First, participants were recruited from 21 countries  
51  
52 involving 6 regions of the world. The finding of this study is therefore internationally  
53  
54 generalizable regardless of languages and cultures. Second, both PWH and participants  
55  
56  
57  
58  
59  
60

1  
2  
3 without bleeding disorders were recruited, asked PRO questions meaningful to both, and  
4  
5 derived a PROBE score applicable to both. Therefore, we were able to compare the health  
6  
7 status across health-specific conditions (hemophilia vs non-hemophilia in this study). There is  
8  
9 a potential role for the use of the PROBE questionnaire to compare health status between  
10  
11 PWH with any other diseases that share common features, e.g. von Willebrand disease,  
12  
13 rheumatoid arthritis or osteoarthritis. Third, both school-aged and adult participants were  
14  
15 included. The work or school life was assessed in the same manner. As a result, the PROBE  
16  
17 questionnaire is valid to implement in participants in all age groups (starting at the not-yet  
18  
19 defined age when one is able to comprehend the questionnaire). Third, the questions in the  
20  
21 PROBE questionnaire included a standardized observation period in each question stem,  
22  
23 generally the past 12 months. This is helpful for participants to respond to each item closest to  
24  
25 their actual health condition in a specific time frame.  
26  
27  
28  
29

30  
31 This PROBE Project also has some limitations, the first being that responsiveness of the  
32  
33 PROBE Score has not been validated currently. This study was conducted with a cross-  
34  
35 sectional study design. This means participants responded to the questionnaire at a single time.  
36  
37 Assessing responsiveness requires a more complicated and demanding study design, which  
38  
39 will be addressed in the future. Second, the observation period in the items was up to 12  
40  
41 months. Whereas this was chosen to maximize capturing the impact of rare events, it might  
42  
43 introduce recall bias in some participants. Third, a ceiling effect was observed for all except  
44  
45 one item concerning PRO, as well as, all EQ-5D-5L items. The recent study regarding floor  
46  
47 and ceiling effects of the EQ-5D-5L in 996 English general population showed that 47.6% of  
48  
49 respondents reported the best possible health state (ceiling effect)<sup>36</sup>. In addition, the ceiling  
50  
51 effects ranged from 58.4% to 90.8% in the subdomains<sup>36</sup>. The floor effects in the study were  
52  
53  
54  
55  
56  
57  
58  
59  
60

1  
2  
3 relatively lower than the previous reports<sup>36</sup>, probably because sicker participants (PWH) were  
4  
5 included  
6  
7  
8  
9  
10  
11  
12  
13  
14  
15  
16  
17  
18  
19  
20  
21  
22  
23  
24  
25  
26  
27  
28  
29  
30  
31  
32  
33  
34  
35  
36  
37  
38  
39  
40  
41  
42  
43  
44  
45  
46  
47  
48  
49  
50  
51  
52  
53  
54  
55  
56  
57  
58  
59  
60

## Conclusions

The properties of the PROBE questionnaire are suited for differentiating PWH with better or worse health status. The immediate use of the PROBE score based on these results would be in cross-sectional comparisons among different settings, e.g. those defined by different levels of access to care. Future applications, as assessing treatment effect in clinical trials, or monitoring patients' health status over time in longitudinal observational studies will enable us to define the responsiveness properties of PROBE to meaningful treatment and disease changes over time.

## List of abbreviations

PROBE: Psychometric properties of the Patient Reported Outcomes Burdens and Experiences; EQ-5D-5L: EuroQol five dimension 5-level instrument; F:factor; EQ-VAS: EuroQol visual analog scale; PWH: people with hemophilia; HIV: Human immunodeficiency virus; HCV: hepatitis C virus; HRQoL: health-related quality of life; PRO: Patient reported outcome; ISPOR: International Society for Pharmacoeconomic and Outcomes Research; NGO: non-governmental organization; SD: standard deviation; ANOVA; analysis of variance

## Declarations

### Ethics approval and consent to participate

Ethical approval was obtained from the Hamilton Integrated Research Ethics Boards.

Additional local review ethical board approval was obtained when requested by the local regulation.

Consent for publication

Not Applicable.

Availability of data and material

Not Applicable.

Competing interests

CC, LT, MAC have no potential conflict of interest. Investigators received grants from Baxalta, now part of Shire; Bayer; Bioverativ; CSL Behring, Novo Nordisk; Roche; and Sobi and non-financial support from the US National Hemophilia Foundation.



## **Funding**

PROBE is an independent investigator led research project with grant / research support from: Baxalta, now part of Shire; Bayer; Bioverativ; CSL Behring; Novo Nordisk, Roche and Sobi with administrative support provided by the US National Hemophilia Foundation.

Acknowledgements: The PROBE investigators wish to thank the hemophilia patient organizations that have participated in the project and two anonymous reviewers for significant contribution to the quality and clarity of the final version of this manuscript, including some key methodological references.

## **Authors' contributions**

MS, AI, RC, NF, MN, DN, BOM, DP and JS conceptualized the study. CC and LT performed data collection and statistical analysis. CC, AI, MAC and MS drafted the manuscript. All authors critically reviewed the manuscript. All authors approved the final manuscript.

## References

1. White GC, 2nd, Rosendaal F, Aledort LM, et al. Definitions in hemophilia. Recommendation of the scientific subcommittee on factor VIII and factor IX of the scientific and standardization committee of the International Society on Thrombosis and Haemostasis. *Thromb Haemost* 2001;85(3):560.
2. Avina-Zubieta JA, Galindo-Rodriguez G, Lavalle C. Rheumatic manifestations of hematologic disorders. *Curr Opin Rheumatol* 1998;10(1):86-90.
3. McCoy HE, 3rd, Kitchens CS. Small bowel hematoma in a hemophiliac as a cause of pseudoappendicitis: diagnosis by CT imaging. *Am J Hematol* 1991;38(2):138-9.
4. Fernandez-Palazzi F, Hernandez SR, De Bosch NB, et al. Hematomas within the iliopsoas muscles in hemophilic patients: the Latin American experience. *Clin Orthop Relat Res* 1996(328):19-24.
5. Small S, Rose PE, McMillan N, et al. Haemophilia and the kidney: assessment after 11-year follow-up. *Br Med J (Clin Res Ed)* 1982;285(6355):1609-11.
6. Ljung RC. Intracranial haemorrhage in haemophilia A and B. *Br J Haematol* 2008;140(4):378-84. doi: 10.1111/j.1365-2141.2007.06949.x
7. Darby SC, Kan SW, Spooner RJ, et al. Mortality rates, life expectancy, and causes of death in people with hemophilia A or B in the United Kingdom who were not infected with HIV. *Blood* 2007;110(3):815-25. doi: 10.1182/blood-2006-10-050435
8. Rodriguez-Merchan EC. Musculoskeletal complications of hemophilia. *HSS J* 2010;6(1):37-42. doi: 10.1007/s11420-009-9140-9
9. Lobet S, Hermans C, Lambert C. Optimal management of hemophilic arthropathy and hematomas. *J Blood Med* 2014;5:207-18. doi: 10.2147/JBM.S50644
10. Mazepa MA, Monahan PE, Baker JR, et al. Men with severe hemophilia in the United States: birth cohort analysis of a large national database. *Blood* 2016;127(24):3073-81. doi: 10.1182/blood-2015-10-675140
11. Tagliaferri A, Di Perna C, Santoro C, et al. Cancers in patients with hemophilia: a retrospective study from the Italian Association of Hemophilia Centers. *J Thromb Haemost* 2012;10(1):90-5. doi: 10.1111/j.1538-7836.2011.04566.x
12. Kulkarni R, Soucie JM, Evatt BL, et al. Prevalence and risk factors for heart disease among males with hemophilia. *Am J Hematol* 2005;79(1):36-42. doi: 10.1002/ajh.20339
13. Sharathkumar AA, Soucie JM, Trawinski B, et al. Prevalence and risk factors of cardiovascular disease (CVD) events among patients with haemophilia: experience of a single haemophilia treatment centre in the United States (US). *Haemophilia* 2011;17(4):597-604. doi: 10.1111/j.1365-2516.2010.02463.x
14. Ferreira AA, Leite IC, Bustamante-Teixeira MT, et al. Health-related quality of life in hemophilia: results of the Hemophilia-Specific Quality of Life Index (Haem-a-Qol) at a Brazilian blood center. *Rev Bras Hematol Hemoter* 2013;35(5):314-8. doi: 10.5581/1516-8484.20130108
15. Health USDo, Human Services FDACfDE, Research, et al. Guidance for industry: patient-reported outcome measures: use in medical product development to support labeling claims: draft guidance. *Health Qual Life Outcomes* 2006;4:79. doi: 10.1186/1477-7525-4-79

16. Deshpande PR, Rajan S, Sudeepthi BL, et al. Patient-reported outcomes: A new era in clinical research. *Perspect Clin Res* 2011;2(4):137-44. doi: 10.4103/2229-3485.86879
17. Lowe MM, Blaser DA, Cone L, et al. Increasing Patient Involvement in Drug Development. *Value Health* 2016;19(6):869-78. doi: 10.1016/j.jval.2016.04.009
18. Hoos A, Anderson J, Boutin M, et al. Partnering With Patients in the Development and Lifecycle of Medicines: A Call for Action. *Ther Innov Regul Sci* 2015;49(6):929-39. doi: 10.1177/2168479015580384
19. Skinner MW. WFH: closing the global gap--achieving optimal care. *Haemophilia* 2012;18 Suppl 4:1-12. doi: 10.1111/j.1365-2516.2012.02822.x
20. Noone D, O'Mahony B, van Dijk JP, et al. A survey of the outcome of prophylaxis, on-demand treatment or combined treatment in 18-35-year old men with severe haemophilia in six countries. *Haemophilia* 2013;19(1):44-50. doi: 10.1111/j.1365-2516.2012.02934.x
21. Benjamin K, Vernon MK, Patrick DL, et al. Patient-Reported Outcome and Observer-Reported Outcome Assessment in Rare Disease Clinical Trials: An ISPOR COA Emerging Good Practices Task Force Report. *Value Health* 2017;20(7):838-55. doi: 10.1016/j.jval.2017.05.015
22. Skinner MW, Driessens M, Curtis R, et al. The Patient Reported Outcomes, Burdens and Experiences (PROBE) Study Phase 1 Methodology and Feasibility. *Haemophilia* 2016;22 (Suppl. 4):118.
23. EuroQol G. EuroQol--a new facility for the measurement of health-related quality of life. *Health Policy* 1990;16(3):199-208.
24. Dyer JS, Rarin RK. Measurable multiattribute value functions. *Oper Res* 1979;27: 810 - 22.
25. Kirkwood CW. Strategic Decision Making: Multiobjective Decision Analysis with Spreadsheets Belmont, CA: Wadsworth Publ. Co 1996.
26. Chai-Adisaksopha C, Iorio A, Curtis R, et al. Test-Retest Reliability Analysis of The Patient Reported Outcomes Burdens and Experiences (PROBE) Study. *Haemophilia* 2017;23 (Suppl.2):29-140. [abstract P037]. doi: 10.1302/0301-620X.92B8.23922
27. Larsen R, Warne RT. Estimating confidence intervals for eigenvalues in exploratory factor analysis. *Behav Res Methods* 2010;42(3):871-6. doi: 10.3758/BRM.42.3.871
28. Cronbach LJ, Warrington WG. Time-limit tests: estimating their reliability and degree of speeding. *Psychometrika* 1951;16(2):167-88.
29. Evans JD. Straightforward statistics for the behavioral sciences. Pacific Grove, CA: Brooks/Cole Publishing. 1996.
30. Tabachnick BG, Fidell LS. Using multivariate statistics. Boston, MA: Allyn & Bacon 2007.
31. Herdman M, Gudex C, Lloyd A, et al. Development and preliminary testing of the new five-level version of EQ-5D (EQ-5D-5L). *Qual Life Res* 2011;20(10):1727-36. doi: 10.1007/s11136-011-9903-x
32. McLaughlin JM, Munn JE, Anderson TL, et al. Predictors of quality of life among adolescents and young adults with a bleeding disorder. *Health Qual Life Outcomes* 2017;15(1):67. doi: 10.1186/s12955-017-0643-7

- 1  
2  
3 33. Brown TM, Lee WC, Joshi AV, et al. Health-related quality of life and productivity  
4 impact in haemophilia patients with inhibitors. *Haemophilia* 2009;15(4):911-7. doi:  
5 10.1111/j.1365-2516.2009.02032.x  
6  
7 34. Recht M, Neufeld EJ, Sharma VR, et al. Impact of acute bleeding on daily activities of  
8 patients with congenital hemophilia with inhibitors and their caregivers and families:  
9 observations from the Dosing Observational Study in Hemophilia (DOSE). *Value*  
10 *Health* 2014;17(6):744-8. doi: 10.1016/j.jval.2014.07.003  
11  
12 35. Scalone L, Mantovani LG, Mannucci PM, et al. Quality of life is associated to the  
13 orthopaedic status in haemophilic patients with inhibitors. *Haemophilia*  
14 2006;12(2):154-62. doi: 10.1111/j.1365-2516.2006.01204.x  
15  
16 36. Feng Y, Devlin N, Herdman M. Assessing the health of the general population in England:  
17 how do the three- and five-level versions of EQ-5D compare? *Health Qual Life*  
18 *Outcomes* 2015;13:171. doi: 10.1186/s12955-015-0356-8  
19  
20  
21  
22  
23  
24  
25  
26  
27  
28  
29  
30  
31  
32  
33  
34  
35  
36  
37  
38  
39  
40  
41  
42  
43  
44  
45  
46  
47  
48  
49  
50  
51  
52  
53  
54  
55  
56  
57  
58  
59  
60

1  
2  
3  
4  
5  
6  
7  
8  
9  
10  
11  
12  
13  
14  
15  
16  
17  
18  
19  
20  
21  
22  
23  
24  
25  
26  
27  
28  
29  
30  
31  
32  
33  
34  
35  
36  
37  
38  
39  
40  
41  
42  
43  
44  
45  
46  
47  
48  
49  
50  
51  
52  
53  
54  
55  
56  
57  
58  
59  
60

Figure legends

Figure 1 Flow diagram of participant selection

Figure 2. Scree plot of exploratory principal-component factors analysis

For peer review only

Table 1. Participants' characteristics

| Characteristics                                           | Participants<br>(n=916) |
|-----------------------------------------------------------|-------------------------|
| Age, median (Q1, Q3)                                      | 37 (27, 48)             |
| Diagnosis, n (%)                                          |                         |
| • Hemophilia A                                            | 532 (58.1)              |
| • Hemophilia B                                            | 82 (8.9)                |
| • Non-hemophilia                                          | 302 (33.0)              |
| Severity of hemophilia*, n (%)                            |                         |
| • Normal                                                  | 3 (0.6)                 |
| • Mild                                                    | 54 (10.6)               |
| • Moderate                                                | 88 (17.3)               |
| • Severe                                                  | 352 (69.3)              |
| • Do not know                                             | 11 (2.2)                |
| Ever been diagnosed with inhibitor*, n (%)                |                         |
| • Yes                                                     | 70 (14.1)               |
| • No                                                      | 384 (77.2)              |
| • Do not know                                             | 43 (8.7)                |
| Currently have an clinically significant inhibitor, n (%) | 24 (2.6)                |
| Sex, n (%)                                                |                         |
| • Male                                                    | 685 (74.8)              |
| • Female                                                  | 231 (25.2)              |
| Age when started school, median (Q1, Q3)                  | 6 (5, 6)                |
| Year of school or education, median (Q1, Q3)              | 15 (12, 18)             |
| Married or long-term relationship, n (%)                  | 581 (69.0)              |
| Having Children, n (%)                                    | 462 (55.3)              |
| Region, n (%)                                             |                         |
| Africa                                                    | 8 (0.9)                 |
| Western Pacific                                           | 216 (23.6)              |
| South America                                             | 343 (37.4)              |
| North America                                             | 138 (15.1)              |
| Europe                                                    | 211 (23.0)              |

\*hemophilia population

Abbreviations: Q1; the first quartile, Q3; the third quartile

Table 2. Item distribution and missing data

| Item                                     | Floor (%) | Ceiling (%) | Missing (%) |
|------------------------------------------|-----------|-------------|-------------|
| Patient reported outcome                 |           |             |             |
| Q.8 Problem related to health*           | 59.1      | 32.3        | 8.6         |
| Q.9 Mobility aids or assistive devices   | 0.1       | 0           | 11.5        |
| Q.10 Pain medications                    | 3.0       | 14.6        | 12.3        |
| Q.11.1 Acute pain (activities)           | 0.7       | 33.1        | 12.8        |
| Q.11.2 Acute pain (interference)         | 0.3       | 33.2        | 12.8        |
| Q.12.1 Chronic pain (activities)         | 1.4       | 32.6        | 13.5        |
| Q.12.2 Chronic pain (interference)       | 0.1       | 33.6        | 13.5        |
| Q.13 Daily activities                    | 0.1       | 42.4        | 14.3        |
| Q.14 Work/school life                    | 0.1       | 27.8        | 21.8        |
| Q.15 Joint surgery or procedure          | 1.3       | 52.4        | 17.0        |
| Q.16 Comorbid diseases                   | 0         | 56.1        | 0           |
| Hemophilia related health                |           |             |             |
| Q.17 Severity                            | N/A       | N/A         | 17.3        |
| Q.18 Inhibitor status                    | N/A       | N/A         | 19.1        |
| Q.19 Bleeding in the past 12 months      | 16.6      | 8.5         | 18.2        |
| Q.20 Bleeding in the past 2 weeks        | N/A       | N/A         | 18.9        |
| Q.21 Hemophilia treatment center         | N/A       | N/A         | 19.4        |
| Q.25 Target joints                       | N/A       | N/A         | 22.6        |
| Q. 26 spontaneous bleeding               | N/A       | N/A         | 49.4        |
| Q.27 Limitation of range of motion*      | 66.6      | 11.4        | 22.0        |
| Q.28 Life- or limb-threatening bleeding* | 15.2      | 62.1        | 22.8        |
| EQ-5D-5L and EQ-VAS                      |           |             |             |
| Mobility                                 | 1.1       | 32.4        | 21.6        |
| Self-care                                | 0.7       | 55.0        | 22.3        |
| Usual activities                         | 0.7       | 37.9        | 22.4        |
| Pain/discomfort                          | 1.1       | 23.9        | 22.9        |
| Anxiety/depression                       | 1.6       | 37.3        | 22.8        |
| VAS                                      | 0         | 3.1         | 22.8        |

\*dichotomous outcome

N/A: not applicable

Table 3. Principal-component factors analysis, non-orthogonal rotated structure matrix loadings

| Items                                  | Factor1       | Factor2       | Uniqueness |
|----------------------------------------|---------------|---------------|------------|
| Q.8 Problem related to health          | <b>0.5648</b> | 0.1011        | 0.6707     |
| Q.9 Mobility aids or assistive devices | <b>0.4653</b> | -0.1721       | 0.7539     |
| Q.10 Pain medications                  | <b>0.6571</b> | -0.0856       | 0.5609     |
| Q.11.1 Acute pain (activities)         | <b>0.7273</b> | -0.2825       | 0.3913     |
| Q.11.2 Acute pain (interference)       | <b>0.7275</b> | -0.3425       | 0.3535     |
| Q.12.1 Chronic pain (activities)       | <b>0.7853</b> | 0.1408        | 0.3635     |
| Q.12.2 Chronic pain (interference)     | <b>0.8061</b> | 0.1257        | 0.3344     |
| Q.13 Daily activities                  | <b>0.7868</b> | 0.0102        | 0.3808     |
| Q.14 Work/school life                  | <b>0.5562</b> | -0.2130       | 0.6453     |
| Q.15 Joint surgery or procedure        | 0.3142        | <b>0.6981</b> | 0.4139     |
| Q.16 Comorbid diseases                 | 0.4140        | <b>0.5146</b> | 0.5638     |

Table 4. Correlations between PROBE and EQ-5D-5L items (convergent validity)

| EQ-5D-5L            | PROBE                              | Correlation | 95% confidence interval |
|---------------------|------------------------------------|-------------|-------------------------|
| Mobility            | Q.9 Mobility aids                  | 0.42        | 0.35 to 0.47            |
| Pain and discomfort | Q.10 Pain medications              | 0.55        | 0.50-0.60               |
|                     | Q.11.1 Acute pain (activities)     | 0.42        | 0.36 to 0.48            |
|                     | Q.11.2 Acute pain (interference)   | 0.39        | 0.32 to 0.45            |
|                     | Q.12.1 Chronic pain (activities)   | 0.56        | 0.51 to 0.61            |
|                     | Q.12.2 Chronic pain (interference) | 0.57        | 0.52 to 0.62            |
| Self care           | Q.13 Activities of daily living    | 0.65        | 0.61 to 0.69            |
| Usual activities    | Q.13 Activities of daily living    | 0.71        | 0.67 to 0.74            |
| Anxiety             | N/A                                | N/A         | N/A                     |
| Utility index score | Total score                        | 0.67        | 0.62 to 0.71            |



Table 5. Known group validity analyses, univariate analysis

| Subgroup                                                                                                                                                                                                                                                      | Total PROBE score, mean (SD)                                                                                         | p-value |
|---------------------------------------------------------------------------------------------------------------------------------------------------------------------------------------------------------------------------------------------------------------|----------------------------------------------------------------------------------------------------------------------|---------|
| Q.2 Diagnosis <ul style="list-style-type: none"> <li>• Non-hemophilia</li> <li>• Hemophilia</li> </ul>                                                                                                                                                        | 0.87 (0.11)<br>0.71 (0.16)                                                                                           | <0.001  |
| Q.17 Severity of hemophilia <ul style="list-style-type: none"> <li>• Mild-moderate</li> <li>• Severe</li> </ul>                                                                                                                                               | 0.71 (0.16)<br>0.70 (0.16)                                                                                           | 0.45    |
| Q.18 Current inhibitor <ul style="list-style-type: none"> <li>• No</li> <li>• Yes</li> </ul>                                                                                                                                                                  | 0.71 (0.19)<br>0.67 (0.12)                                                                                           | 0.35    |
| Q.19 Number of bleeds in past year <ul style="list-style-type: none"> <li>• 0 bleed</li> <li>• 1 bleed</li> <li>• 2-3 bleeds</li> <li>• 4-7 bleeds</li> <li>• 8-10 bleeds</li> <li>• 11-15 bleeds</li> <li>• 16-30 bleeds</li> <li>• &gt;30 bleeds</li> </ul> | 0.80 (0.14)<br>0.85 (0.11)<br>0.75 (0.15)<br>0.74 (0.14)<br>0.70 (0.13)<br>0.68 (0.12)<br>0.65 (0.15)<br>0.61 (0.15) | <0.001  |
| Q.20 Bleed in the past two weeks <ul style="list-style-type: none"> <li>• No</li> <li>• Yes</li> </ul>                                                                                                                                                        | 0.76 (0.15)<br>0.67 (0.15)                                                                                           | <0.001  |
| Q.25 Target joint <ul style="list-style-type: none"> <li>• No</li> <li>• Yes</li> </ul>                                                                                                                                                                       | 0.78 (0.16)<br>0.68 (0.15)                                                                                           | <0.001  |
| Q.26 Spontaneous joint bleeding <ul style="list-style-type: none"> <li>• No</li> <li>• Yes</li> </ul>                                                                                                                                                         | 0.73 (0.15)<br>0.66 (0.14)                                                                                           | 0.0004  |
| Q.27 having reduced range of motion <ul style="list-style-type: none"> <li>• No</li> <li>• Yes</li> </ul>                                                                                                                                                     | 0.86 (0.13)<br>0.68 (0.14)                                                                                           | <0.001  |
| Q.28 Life threatening bleed <ul style="list-style-type: none"> <li>• No</li> <li>• Yes</li> </ul>                                                                                                                                                             | 0.72 (0.15)<br>0.62 (0.16)                                                                                           | <0.001  |

Table 6. Coefficients derived from multivariable linear regression analysis

|                                     | Coefficient* | 95% confidence interval | p-value |
|-------------------------------------|--------------|-------------------------|---------|
| Q.2 Diagnosis                       |              |                         |         |
| • Non-hemophilia                    | Control      | N/A                     | N/A     |
| • hemophilia                        | -0.22        | -0.25 to -0.18          | <0.001  |
| Q.17 Severity of hemophilia         |              |                         |         |
| • Mild-Moderate                     | Control      | N/A                     | N/A     |
| • Severe                            | -0.003       | -0.03 to 0.03           | 0.83    |
| Q.18 Current inhibitor              |              |                         |         |
| • No                                | Control      | N/A                     | N/A     |
| • Yes                               | -0.04        | -0.14 to 0.05           | 0.34    |
| Q.19 Number of bleeds in past year  |              |                         |         |
| • 0 bleed                           | Control      | N/A                     | N/A     |
| • 1 bleed                           | 0.04         | -0.03 to 0.10           | 0.29    |
| • 2-3 bleeds                        | -0.06        | -0.11 to 0.001          | 0.06    |
| • 4-7 bleeds                        | -0.07        | -0.12 to -0.01          | 0.02    |
| • 8-10 bleeds                       | -0.10        | -0.16 to -0.03          | 0.002   |
| • 11-15 bleeds                      | -0.14        | -0.20 to 0.08           | <0.001  |
| • 16-30 bleeds                      | -0.15        | -0.21 to -0.09          | <0.001  |
| • >30 bleeds                        | -0.19        | -0.24 to -0.13          | <0.001  |
| Q.20 Bleed in the past two weeks    |              |                         |         |
| • No                                | Control      | N/A                     | N/A     |
| • Yes                               | -0.09        | -0.12 to -0.07          | <0.001  |
| Q.25 Target joint                   |              |                         |         |
| • No                                | Control      | N/A                     | N/A     |
| • Yes                               | -0.09        | -0.13 to -0.06          | <0.001  |
| Q.26 Spontaneous joint bleeding     |              |                         |         |
| • No                                | Control      | N/A                     | N/A     |
| • Yes                               | -0.09        | -0.12 to -0.05          | <0.001  |
| Q.27 having reduced range of motion |              |                         |         |
| • No                                | Control      | N/A                     | N/A     |
| • Yes                               | -0.14        | -0.19 to -0.11          | <0.001  |
| Q.28 Life threatening bleed         |              |                         |         |
| • No                                | Control      | N/A                     | N/A     |
| • Yes                               | -0.10        | -0.13 to -0.06          | <0.001  |

\*Adjusted from age and sex

Abbreviation: N/A; not applicable

1  
2  
3  
4  
5  
6  
7  
8  
9  
10  
11  
12  
13  
14  
15  
16  
17  
18  
19  
20  
21  
22  
23  
24  
25  
26  
27  
28  
29  
30  
31  
32  
33  
34  
35  
36  
37  
38  
39  
40  
41  
42  
43  
44  
45  
46  
47  
48  
49  
50  
51  
52  
53  
54  
55  
56  
57  
58  
59  
60

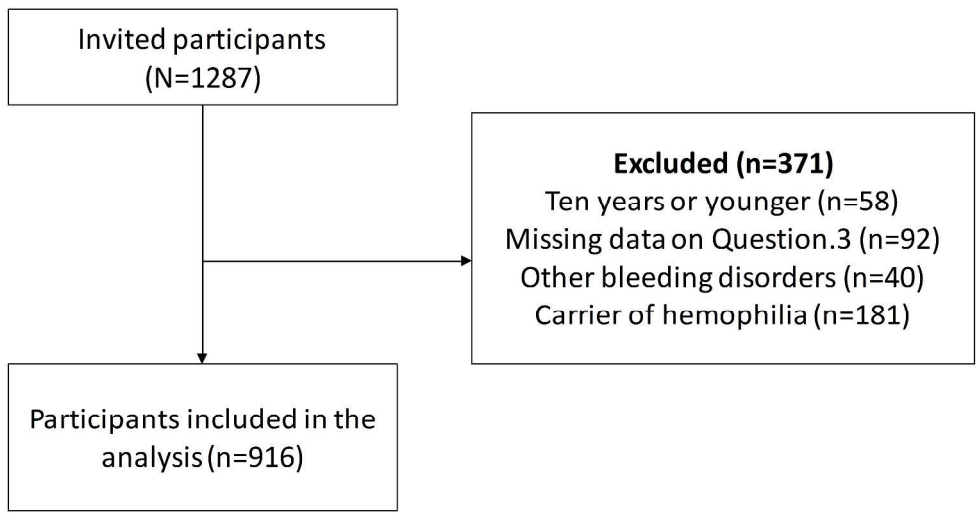

Figure 1 Flow diagram

er review only

1  
2  
3  
4  
5  
6  
7  
8  
9  
10  
11  
12  
13  
14  
15  
16  
17  
18  
19  
20  
21  
22  
23  
24  
25  
26  
27  
28  
29  
30  
31  
32  
33  
34  
35  
36  
37  
38  
39  
40  
41  
42  
43  
44  
45  
46  
47  
48  
49  
50  
51  
52  
53  
54  
55  
56  
57  
58  
59  
60

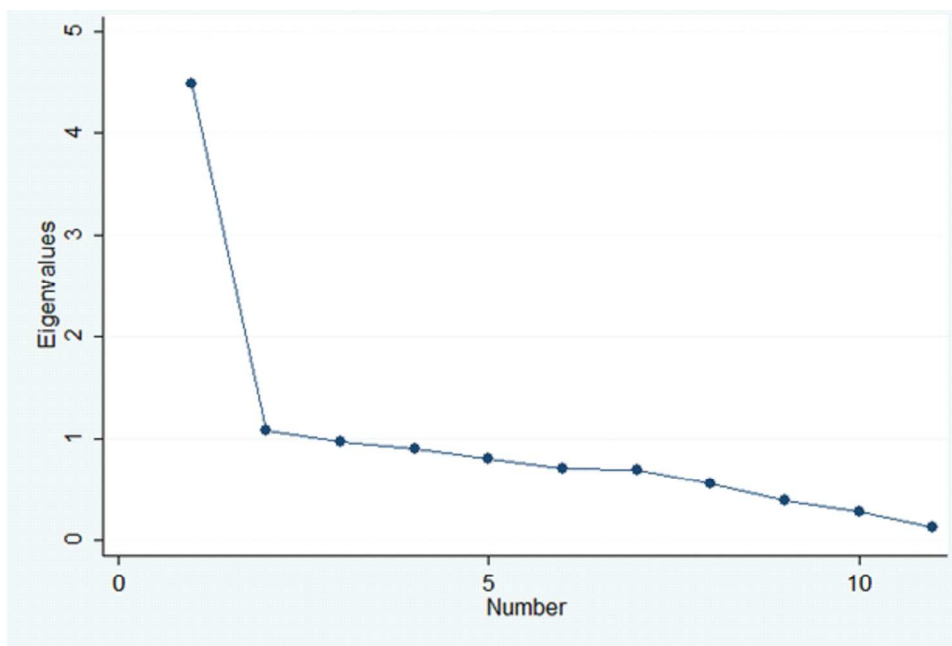

Figure 2 Scree plot

Review only

# BMJ Open

## Psychometric properties of the Patient Reported Outcomes Burdens and Experiences (PROBE) Questionnaire

|                                 |                                                                                                                                                                                                                                                                                                                                                                                                                                                                                                                                                                                                                                                                                                                                                                                                                                                                                             |
|---------------------------------|---------------------------------------------------------------------------------------------------------------------------------------------------------------------------------------------------------------------------------------------------------------------------------------------------------------------------------------------------------------------------------------------------------------------------------------------------------------------------------------------------------------------------------------------------------------------------------------------------------------------------------------------------------------------------------------------------------------------------------------------------------------------------------------------------------------------------------------------------------------------------------------------|
| Journal:                        | <i>BMJ Open</i>                                                                                                                                                                                                                                                                                                                                                                                                                                                                                                                                                                                                                                                                                                                                                                                                                                                                             |
| Manuscript ID                   | bmjopen-2018-021900.R1                                                                                                                                                                                                                                                                                                                                                                                                                                                                                                                                                                                                                                                                                                                                                                                                                                                                      |
| Article Type:                   | Research                                                                                                                                                                                                                                                                                                                                                                                                                                                                                                                                                                                                                                                                                                                                                                                                                                                                                    |
| Date Submitted by the Author:   | 23-Apr-2018                                                                                                                                                                                                                                                                                                                                                                                                                                                                                                                                                                                                                                                                                                                                                                                                                                                                                 |
| Complete List of Authors:       | Chai-Adisaksopha, Chatree; McMaster University, Medicine; McMaster University, Health Research Methods, Evidence, and Impact<br>Skinner, Mark; Institute for Policy Advancement Ltd<br>Curtis, Randall; Factor VIII Computing<br>Frick, Neil; National Hemophilia Foundation<br>Nichol, Michael; University of Southern California Sol Price School of Public Policy<br>Noone, Declan; Irish Haemophilia Society<br>O'Mahony, Brian ; Irish Haemophilia Society; Trinity College Dublin<br>Page, David; Canadian Hemophilia Society<br>Stonebraker, Jeffrey ; North Carolina State University Poole College of Management<br>Thabane, Lehana; McMaster University, Health Research Methods, Evidence, and Impact; St Joseph's Healthcare, Biostatistics Unit<br>Crowther, Mark; McMaster University, Canada<br>Iorio, Alfonso; McMaster University, Clinical Epidemiology and Biostatistics |
| <b>Primary Subject Heading</b>: | Patient-centred medicine                                                                                                                                                                                                                                                                                                                                                                                                                                                                                                                                                                                                                                                                                                                                                                                                                                                                    |
| Secondary Subject Heading:      | Haematology (incl blood transfusion)                                                                                                                                                                                                                                                                                                                                                                                                                                                                                                                                                                                                                                                                                                                                                                                                                                                        |
| Keywords:                       | validity, hemophilia, patient reported outcome, quality of life, questionnaire                                                                                                                                                                                                                                                                                                                                                                                                                                                                                                                                                                                                                                                                                                                                                                                                              |
|                                 |                                                                                                                                                                                                                                                                                                                                                                                                                                                                                                                                                                                                                                                                                                                                                                                                                                                                                             |

SCHOLARONE™  
Manuscripts

1 Psychometric properties of the Patient Reported Outcomes Burdens and Experiences

2 (PROBE) Questionnaire

3

4 Authors

5 Chatree Chai-Adisaksopha<sup>1,2</sup>, Mark Skinner<sup>3</sup>, Randall Curtis<sup>4</sup>, Neil Frick<sup>5</sup>, Michael B.

6 Nichol<sup>6</sup>, Declan Noone<sup>7</sup>, Brian O'Mahony<sup>7,8</sup>, David Page<sup>9</sup>, Jeffrey Stonebraker<sup>10</sup>, Lehana

7 Thabane<sup>2,11</sup>, Mark Crowther<sup>1,2</sup> and Alfonso Iorio<sup>1,2</sup>

8 **Authors' affiliations**

9 <sup>1</sup>Department of Medicine, McMaster University, Hamilton, ON, Canada

10 <sup>2</sup>Department of Health Research Methods, Evidence, and Impact, McMaster University,

11 Hamilton, Canada

12 <sup>3</sup>Institute for Policy Advancement Ltd, Washington, DC, US

13 <sup>4</sup>Factor VIII Computing, Berkeley, US

14 <sup>5</sup>National Hemophilia Foundation, New York, US

15 <sup>6</sup>Sol Price School of Public Policy, University of Southern California, Los Angeles, US

16 <sup>7</sup>Irish Haemophilia Society, Dublin, Ireland

17 <sup>8</sup>Trinity College Dublin, Dublin, Ireland

18 <sup>9</sup>Canadian Hemophilia Society, Montreal, Canada

19 <sup>10</sup>Poole College of Management, North Carolina State University, Raleigh, US

20 <sup>11</sup>Biostatistics Unit, St Joseph's Healthcare, Hamilton, Canada

1 **Sources of financial support:** PROBE is an independent investigator led research project  
2 with grant / research support from: Baxalta, now part of Shire; Bayer; Bioverativ; CSL  
3 Behring; Novo Nordisk, Roche and Sobi with administrative support provided by the US  
4 National Hemophilia Foundation.

5 **Acknowledgements:** We thank the hemophilia patient organizations that have participated in  
6 the PROBE Project: Fundación de la Hemofilia (Argentina) Cordoba Chapter; Hemophilia  
7 Foundation Australia (Australia); Federação Brasileira de Hemofilia (Brazil); Canadian  
8 Hemophilia Society (Canada); Association Française des Hémophiles (France); Deutsche  
9 Hämophiliegesellschaft (Germany); Magyar Hemofilia Egyesület (Hungary); Irish  
10 Haemophilia Society (Ireland); Federazione delle Associazioni Emofilici (Italy); National  
11 Hemophilia Network of Japan (Japan); Federación de Hemofilia de la República Mexicana  
12 (Mexico); Nederlandse Vereniging van Hemofilie- Patiënten (The Netherlands); Haemophilia  
13 Foundation of New Zealand (New Zealand); Haemophilia Foundation of Nigeria (Nigeria);  
14 Polish Hemophilia Society (Poland), Federación Española de Hemofilia (Spain); The  
15 Haemophilia Society (United Kingdom); National Hemophilia Foundation (United States);  
16 Asociación Venezolana para la Hemofilia (Venezuela) and Vietnamese Hemophilia  
17 Association (Vietnam). We also thank two anonymous reviewers for significant contribution  
18 to the quality and clarity of the final version of this manuscript, including some key  
19 methodological references.

20 **Running title:** Psychometric properties of PROBE

21 **Keywords:** validity, hemophilia, patient reported outcome, quality of life, questionnaire

22 **Word count:** Abstract 245, Text 3715

23 **Table and Figure:** 6 tables, 1 figure

1  
2  
3 **1 Correspondence:**  
4

5  
6 **2 Mark W. Skinner**

7  
8 **3 1155 23rd Street NW #3A**

9  
10 **4 Washington DC 20037 USA**

11  
12 **5 Email: mskinnerdc@gmail.com**

13  
14 **6 Tel.: +1-202-253-8342**

15  
16 **7 Fax: +1-202-296-1352**

17  
18  
19  
20 **8**

21  
22 **9**

23  
24  
25 **10**

26  
27 **11**

28  
29  
30 **12**

31  
32 **13**

**Abstract**

33  
34  
35 **14 Objective:** To assess the psychometric properties of The Patient Reported Outcomes, Burdens  
36 and Experiences (PROBE) questionnaire.

37  
38  
39 **16 Methods:** This study was a cross-sectional, multi-national study. Participants were enrolled if  
40 they were 10 years or older and patients with hemophilia A or B or people without bleeding  
41 disorder. Participants were invited through non-governmental patient organizations in 21  
42 countries between 04/08/2015 and 12/28/2015. The following psychometric properties:  
43 missing data, floor and ceiling effects, exploratory factor analysis, and internal consistency  
44 reliability were examined. A PROBE Score was derived and assessed for its convergent and  
45 known groups validity.  
46  
47  
48  
49  
50  
51  
52  
53  
54  
55  
56  
57  
58  
59  
60



1 **Results:** The study analyzed the data on 916 participants with median age of 37.0  
2 (interquartile range 27.0 to 48.0) years, 74.8% male. In the domain assessing patient reported  
3 outcomes, more than 15% of participants presented a ceiling effect for all items but two, and a  
4 floor effect for one item. Factor analysis identified two factors explaining the majority of the  
5 variance. Cronbach's alpha coefficient indicated good internal consistency reliability (0.84).  
6 PROBE items showed moderate to strong correlations with corresponding EQ-5D-5L  
7 domains. The PROBE Score has a strong correlation ( $r=0.67$ ) with EQ-5D-5L utility index  
8 score. The PROBE Score has a known groups validity among various groups.

9 **Conclusions:** The results of this study suggest that PROBE is a valid questionnaire for  
10 evaluating PROs in people with hemophilia, as well as control population. The known-group  
11 property of PROBE will allow its use in future clinical trials, longitudinal studies, health  
12 technology assessment studies, routine clinical care or registries. Additional studies are  
13 needed to test responsiveness and sensitivity to change.

14 Trial registration: NCT02439710

15

## 1 **Strengths and limitation**

- 2 • The PROBE questionnaire was conducted to assess patient reported outcomes in  
3 people with hemophilia (PWH). This tool assesses domains pertaining to general  
4 health status, hemophilia related health status and health-related quality of life.
- 5 • The psychometric analyses demonstrate the validity and internal consistency of the  
6 Patient Reported Outcomes Burdens and Experiences (PROBE) Questionnaire.
- 7 • This study was conducted in a large sample of PWH and participants without bleeding  
8 disorders from multiple countries.
- 9 • The responsiveness of the measurement was not investigated in this current study.

1

## 2 **Background**

3 Hemophilia is an inherited X-linked recessive bleeding disorder characterized by the reduction  
4 or absence of blood coagulation factor (F) VIII (hemophilia A) or FIX (hemophilia B).  
5 Severity of hemophilia is categorized by the baseline factor level (mild; factor level >0.05 to  
6 <0.40 IU/ml, moderate; factor level 0.01-0.05 IU/ml and severe; factor level <0.01 IU/ml)<sup>1</sup>.  
7 Coagulation deficiency renders patients prone to abnormal bleeding. Symptoms of hemophilia  
8 vary depending on the severity of hemophilia, mechanism and severity of injury and affected  
9 organs. People with hemophilia (PWH) commonly present with hemarthrosis, gastrointestinal  
10 or genitourinary tract bleeding, intramuscular bleeding or intracranial bleeding<sup>2-6</sup>.  
11 Life expectancy of PWH substantially improved with factor replacement therapy<sup>7</sup>. However,  
12 PWH who live longer encounter more chronic complications from both hemophilia-related  
13 conditions and degenerative diseases that occur in normal population. Chronic degenerative  
14 joint diseases are found in 90% of PWH by the second or third decade of life<sup>8</sup>. PWH with  
15 recurrent joint bleeding suffer from chronic pain, limitation of range of motion and disability  
16<sup>9</sup>. Human immunodeficiency virus (HIV) and hepatitis C virus (HCV) infections are prevalent  
17 among PWH prior to the implementation of intensive viral screening in plasma-derived factor  
18 concentrates and the use of recombinant factor concentrates<sup>10</sup>. One of the major consequences  
19 of chronic HCV infection is cirrhosis, resulting in end-stage liver disease which is the most  
20 common cause of death in PWH<sup>10</sup>. Moreover, 43% of cancers diagnosed in PWH were  
21 related to HCV infection<sup>11</sup>. Aged PWH are also affected by cardiovascular diseases. A  
22 retrospective study using an administrative database of 3,422 males with hemophilia reported  
23 a prevalence of ischemic heart disease of 15% in PWH older than 60 years<sup>12</sup>. Risk factors of

1 cardiovascular disease in PWH are equivalent to patients without hemophilia<sup>13</sup>. These long-  
2 term complications of hemophilia directly impact on health-related quality of life (HRQoL) in  
3 PWH<sup>14</sup>.

4 Patient reported outcomes (PROs) are defined as any reports of status of patients' health  
5 conditions that come directly from the patients without interpretation by clinicians or anyone  
6 else<sup>15</sup>. PROs provide data obtained from patients including symptoms, frequency of  
7 symptoms, severity of symptoms, impact of disease on daily life, disability and perfection of  
8 patients toward diseases and treatments<sup>16</sup>. Thus, PROs have been increasingly valued by  
9 researchers, stakeholders, policy makers and health technology assessment agencies<sup>17-20</sup>.

10 Recently, the International Society for Pharmacoeconomic and Outcomes Research (ISPOR)  
11 Clinical Outcome Assessment Emerging Good Practices Task Force published the Patient-  
12 reported outcome and observer-reported outcome assessment in rare disease clinical trials<sup>21</sup>.  
13 This report demonstrated the challenges of assessing patient-reported outcomes in rare  
14 diseases, for instance, heterogeneity of disease severity and patient experience or  
15 understanding treatment benefit from the patients' perspective. Hemophilia, which is a rare  
16 bleeding disorder, exhibits various disease severity. Moreover, patients' perspective on their  
17 symptoms may be dissimilarly influenced by age, co-morbid disease, inhibitor status, current  
18 treatment or progression of symptoms. Therefore, a hemophilia-specific PRO measure is  
19 essential for assessing outcomes in this patient population.

20 The Patient Reported Outcomes, Burdens and Experiences (PROBE) Project is a patient-lead  
21 research initiative. The main objectives of the PROBE Project are to develop a standardised  
22 PRO questionnaire and to develop a dedicated research network to generate and continuously  
23 update PROBE reference data. The feasibility study of the PROBE questionnaire was

1 conducted in collaborations with non-governmental hemophilia patient organizations (NGOs)  
2 in 21 countries. Previously reported results demonstrated that the burden of the PROBE  
3 questionnaire implementation was minimal and the time required to complete the  
4 questionnaire was less than 15 minutes for over 75% of participants<sup>22</sup>. The objective of the  
5 current study is to assess the psychometric properties of the PROBE questionnaire.  
6

For peer review only

## 1 **Methods**

### 2 **Patient and public involvement**

3 The PROBE Project was initiated and led by investigators who are patients with hemophilia.  
4 Subsequently, the investigators identified and invited a group of national hemophilia patient  
5 organizations to participate in the PROBE Project to form a research network. The patient-  
6 important outcomes and metrics incorporated into the PROBE questionnaire were identified,  
7 developed, and refined by the PROBE investigators and patient representatives from the  
8 participating national patient organizations (see acknowledgments). The patient organization  
9 were then asked to enroll participants. Data from the PROBE study are analyzed, summarized  
10 and disseminated to each patient organization. Full development details of the PROBE  
11 questionnaire and patient-led research network are reported elsewhere<sup>23</sup>.

### 12 **Participant enrollment and study procedure**

13 This study was designed as a cross-sectional assessment. Participants were enrolled through  
14 NGOs from 1/27/2016 to 2/23/2017. Participants were recruited if they were more than 10  
15 years old and they were either PWH (hemophilia A or hemophilia B) or controls (participants  
16 without bleeding disorders). Participants were instructed to complete the questionnaire only  
17 once and answering for themselves, and parents or caregivers were instructed not to answer  
18 for their child. Although collected as part of the study, participants who identified themselves  
19 as carriers of hemophilia were excluded from the analysis. Patients with other bleeding  
20 disorders or an unknown bleeding disorder were also excluded. Participants who did not  
21 respond to Q.3 (hemophilia diagnosis: hemophilia A, hemophilia B, no bleeding disorder)  
22 were excluded from the analysis. The participating NGOs distributed the PROBE  
23 questionnaires through mail, e-mail, in-person meetings or a combination of methods. The

1 PROBE questionnaire was available in 18 languages with localized language versions in both  
2 paper- and web-based format. A central statistical check for duplicates was run, and 3  
3 potential duplicates were excluded.

#### 4 **Ethical approval**

5 Patients' identifier or personal information were not collected as part of the study. Data were  
6 collected as anonymous individuals, and study data were transferred and stored at McMaster  
7 University. Ethical approval was obtained from the Hamilton Integrated Research Ethics  
8 Boards. Additional local review ethical board approval was obtained when requested by the  
9 local regulation.

#### 10 **PROBE questionnaire**

11 The detail of questionnaire development and feasibility study was described elsewhere<sup>22</sup>. The  
12 PROBE questionnaire is organized in 4 sections, comprising 29 questions. Sections are  
13 numbered following the order of presentation in the questionnaire. PROBE PRO domains are  
14 covered in Section II. The questions in Section I and III do not cover PRO domains. Only  
15 PWH are expected to complete Section III, whereas every participant completes Sections I, II  
16 and IV. Section I contains 7 questions pertaining to demographic data (country, gender,  
17 diagnosis of hemophilia or absence of a bleeding disorder, year of birth, body weight, age first  
18 started and finished school, marital status and children). Section II contains 9 questions  
19 pertaining to PROs, including general health issues, use of mobility aids or assistive devices,  
20 pain (including acute, chronic, and pain medications), daily activities, current work or student  
21 status, surgeries or procedures, and co-morbid diseases. Section III contains 12 questions  
22 pertaining to clinical aspects of hemophilia (severity of hemophilia, inhibitor status, bleeding  
23 history, hemophilia care, treatment regimen, target joints, joint bleeding, range of motion and

1 life- or limb-threatening bleeds). Section IV contains the EuroQol five dimension 5-level  
2 instrument (EQ-5D-5L)<sup>24</sup>, consisting of questions regarding mobility, self-care, usual  
3 activities, pain or discomfort and anxiety or depression, and the EuroQol visual analog scale  
4 (EQ-VAS) of global health<sup>24</sup> were incorporated in the PROBE questionnaire with permission.

### 5 **Item scaling and PROBE score calculation**

6 PROs were evaluated only in Section II. The calculation of the PROBE score was based on  
7 multiattribute value functions<sup>25 26</sup>. The assessed scores ( $X_i$ ) were converted to returns-to-scale  
8 score ( $V_i X_i$ ), given that  $0 \leq V_i(X_i) \leq 1$ . Q.8 which had a dichotomous response (0 = no, 1 =  
9 yes) produce dichotomous score of 0 and 1. Two questions (Q.10 and Q.15) asked for  
10 frequency of the use of pain medication(s) and number of surgeries or invasive procedures.  
11 The 6- and 7-level Likert scales from these two questions were converted to a returns-to-scale  
12 score, ranging from 0 to 1. The number of days absent from work or school (Q.14) was  
13 converted to returns-to-scale score by dividing by 366. Questions regarding mobility aids,  
14 acute pain, chronic pain and co-morbid diseases (Q.9, Q.11, Q.12, Q.13 and Q.16) had  
15 multiple choices. The scales for these items were calculated based on the cumulative number  
16 of choices checked. We apply weight for subitems in each question (if needed). The final  
17 score was calculated by summing all of the 11 items scores from the 9 questions using  
18 additive value function and then scaled so the PROBE Score ranged from 0 to 1 (higher value  
19 indicates better health status).

### 20 **Data analyses**

#### 21 **Descriptive statistics**

22 Demographic data of study participants were summarized using mean with corresponding  
23 standard deviation (SD) or median and quartile range as appropriate. Categorical data were



1 summarized using numbers and percentages. Participants who did not respond in Q.3 (disease  
2 status; hemophilia A, hemophilia B, hemophilia carrier, other bleeding disorders or no  
3 bleeding disorder) were excluded from the analysis. An item distribution analysis to evaluate  
4 the proportion of missing data was performed. Floor and ceiling effects were evaluated by the  
5 proportion of respondents with scores at floor (minimum score) and ceiling (maximum score),  
6 respectively. We pre-defined that we would have considered a floor or ceiling effect relevant  
7 using the empirical threshold of 15% and a cumulative ceiling or flooring of 50% as proposed  
8 by Terwee et al<sup>27</sup>.

### 9 **Psychometric analyses**

10 Face and content validity were assessed and reported previously<sup>22</sup>. Test-retest reliability  
11 analyses of the PROBE questionnaire were reported elsewhere<sup>28</sup>. In the current study, the  
12 following psychometric analyses were carried out.

#### 13 *Principal axis factor analysis*

14 An exploratory factor analysis of 9 questions, pertaining to the PROs (Section II). Principal  
15 axis factor analysis with oblique rotation method was performed. The percentage of variance  
16 on the items that were explained by the factors was evaluated. Higher percentage indicated  
17 strong influence of the factors. The regression coefficients (factor loadings) of the item  
18 responses on the retaining factors after factor rotation was calculated.

#### 19 *Internal consistency reliability*

20 An analysis to confirm the precision of the scale based on the intercorrelations of the items  
21 evaluating the same construct was conducted. We hypothesized that the questions asking  
22 about pain and the use of medications (Q.10-Q.13) were correlated. Cronbach's alpha was

1 used to determine the correlation between items. Cronbach's alpha coefficient greater than 0.7  
2 was considered to indicate acceptable reliability<sup>29</sup>.

### 3 *Convergent validity*

4 The convergent validity of the items in the same construct with the existing, standardised  
5 questionnaire were assessed. Specifically, we hypothesized that the items asking about the use  
6 of mobility aids and assistive devices correlated with the mobility domain of EQ-5D-5L; the  
7 items asking about the use of pain medication, acute and chronic pain (Q.10, Q.11 and Q.12)  
8 correlated with pain and discomfort domain of EQ-5D-5L; the items asking about activities of  
9 daily living (Q.13) correlated with the self-care and usual activity domains of EQ-5D-5L<sup>30</sup>.  
10 Each item of EQ-5D-5L was scored, ranging from level 1 (coded as 1) to level 5 (coded as 5).  
11 The health states were converted into a single index value utilizing the United Kingdom value  
12 set. The correlation between the score from each PROBE item and corresponding EQ-5D-5L  
13 domain was calculated. Additionally, the correlation between EQ-5D-5L utility index score  
14 and the PROBE Score was assessed. Correlation coefficient ( $r$ ) was interpreted as:  $r$  0.20-  
15 0.39; weak correlation;  $r$  0.40-0.59, moderate correlation;  $r$  0.60-0.79, strong correlation; and  
16  $r$  0.80-1.00, very strong correlation<sup>31</sup>.

### 17 *Known groups validity*

18 The ability of the PROBE questionnaire to determine the differences between known  
19 subgroups was assessed. Participants were classified into groups, according to information  
20 collected in Section III, as diagnosis (hemophilia or non-hemophilia), severity of hemophilia  
21 (mild, moderate or severe), current inhibitor status (yes or no), number of bleeds in the past  
22 year (categorical variable), bleed in the past two weeks (yes, no), presence of target joint (yes,  
23 no), limitation of range of motion of the joints (yes, no) and life- or limb-threatening bleeding

1 in the past year (yes, no). The PROBE Scores were compared between subgroups using t-test  
2 or one-way ANOVA for the univariate analysis, as appropriate. A priori hypotheses included  
3 PWH (as compared to participants without bleeding disorders), patients with severe  
4 hemophilia (as compared to mild and moderate hemophilia), patients with current inhibitor (as  
5 compared to those without an inhibitor), patients with greater numbers of bleeding, patients  
6 who had recent bleeding within the past 2 weeks (as compared to those without), patients with  
7 presence of target joint(s) (as compared to those without), patients who had reduced range of  
8 motion of any joints (as compared to those without) and patients who had life- or limb-  
9 threatening bleeding in the past year (as compared to those without) had worse PROBE  
10 scores. The multivariable analysis of the known group validity was conducted using a linear  
11 regression. The regression model included age and gender of participants in the analysis.  
12 Regression coefficients with corresponding 95% CI were reported. P-value less than 0.05 was  
13 considered statistically significant.

14

## 1 **Results**

### 2 **Participants' demographic data**

3 Since inception, NGOs from 21 countries have participated in the PROBE Project. For this  
4 study, we performed the analysis using participants' data from the first 17 countries. Figure 1  
5 demonstrates the flow of participant selection for this phase of research. There were 1287  
6 participants who responded to the questionnaire. After excluding hemophilia carriers, other  
7 bleeding disorders and missing value (Question 3), and 3 possible duplicates, the analysis  
8 included 916 participants. Demographic data is shown in Table 1. Median age of PWHs was  
9 lower than that of controls, 33 (quartile 1, quartile 3 of 24, 46) vs 43 (quartile 1, quartile 3 of  
10 34, 54) years. The proportion of male participants in hemophilia group was greater than those  
11 in control group (93.7% vs 6.4%). Among hemophilia patients, most had severe hemophilia.  
12 Seventeen participants (2.6%) of PWH had an inhibitor during the study period.

### 13 **Descriptive analysis**

14 Table 2 demonstrates item distribution and missing data. Ceiling effect greater than 15% was  
15 observed in all but one item (the use of pain medications) in Section II. Similarly, ceiling  
16 effect greater than 15% was observed in all domains of EQ-5D-5L. Floor effect greater than  
17 15% was found in four items (problems related to health, bleeding in the past 12 months,  
18 limitation of range of motion and life- or limb-threatening bleeding). We observed a higher  
19 frequency of ceiling effect among participants without a bleeding disorder as compared to  
20 PWH (data not shown). Missing data was 0% to 21.8% in Section II, 18.2% to 49.4% in  
21 Section III and 21.6% to 22.9% in Section IV. The median PROBE Score across all  
22 participants was 0.78 (mean=0.76, SD=0.16, minimum=0.26 and maximum=0.99).

### 23 *Principal axis factor analysis*

1 The principal component factor analysis of the 9 questions (11 items) pertaining to the PROs  
2 was carried out. These three factors were retained for the following analyses. Table 3  
3 demonstrates factor loadings based on three factors. The items were grouped per factor with  
4 their maximum loading (bold).

5 Factor 1 appears to be the most influential, explaining 87.3% of the variance. There were two  
6 items contained in this factor (activities and interference related to chronic pain). Factor 2  
7 contained two items (activities and interference related to acute pain). Factor 3 contained 2  
8 items pertaining to daily activities and work/school life. All items in the each factor had  
9 acceptable factor loadings ( $r \geq 0.3$ )<sup>32</sup>.

#### 10 *Internal consistency reliability*

11 The Cronbach's alpha coefficient was acceptable at 0.84.

#### 12 *Convergent validity*

13 Table 4 shows the correlation coefficients between PROBE items and EQ-5D-5L. The results  
14 showed that Q. 9 (the use of mobility aids and assistive devices) had a moderate correlation  
15 with mobility domain of EQ-5D-5L ( $r=0.42$ ). The pain and discomfort domain of EQ-5D-5L  
16 had a moderate to strong correlation with most of the pain related items of the PROBE  
17 questionnaire ( $r=0.55$  for pain medication, 0.42 for acute pain occurrence, 0.39 for acute pain  
18 interference, 0.56 for chronic pain occurrence and 0.57 for chronic pain interference). Item  
19 related to activities of daily living had a strong correlation with the self care and usual  
20 activities domain ( $r=0.65$  and 0.71, respectively). The PROBE score had a strong correlation  
21 with the EQ-5D-5L utility index score ( $r=0.67$ ).

#### 22 *Known groups validity*

1 The regression coefficients of each *a priori* variable and the PROBE Score were demonstrated  
2 in Table 5. Participants without a bleeding disorder had a significantly higher PROBE Score  
3 when compared with PWH (mean score (SD), 0.87 (0.11) vs 0.71 (0.16),  $P<0.001$ ). PWH with  
4 mild to moderate hemophilia had a slightly higher PROBE Score (mean 0.71, SD 0.16) than  
5 severe PWH (mean 0.70, SD 0.16), PWH who had a greater number of bleeding episodes had  
6 a significantly lower PROBE Score when compared to those who had less frequent bleeding  
7 ( $P<0.001$ ). Patients who reported bleeding in the past two weeks had a significantly lower  
8 PROBE score (mean 0.67, SD 0.15) than those without (mean 0.76, SD 0.15). Patients who  
9 reported the presence of any target joints had a significantly lower PROBE score (mean 0.68,  
10 SD 0.15) when compared to those who did not (mean 0.78, SD 0.16). Patients who reported  
11 three or more spontaneous joint bleeds in the past 6 months had significantly lower PROBE  
12 score (mean 0.66, SD 0.14) than those who did not report (mean 0.73, SD 0.14). Patients with  
13 reduced range of motion of any joints had a significantly lower PROBE score (mean 0.68, SD  
14 0.14) as compared to those without (mean 0.73, SD 0.15). Patients who previously had life- or  
15 limb-threatening bleeding in the past year had a significantly lower PROBE Score (mean 0.62,  
16 SD 0.16) when compared to those who did not (mean 0.72, SD 0.15). Table 6 demonstrates  
17 multivariable analysis. The findings from multivariable analysis did not change much after  
18 adjusting for age and sex.

19

## 1 Discussion

2 The psychometric properties of the PROBE questionnaire have been assessed, and found that  
3 the PROBE questionnaire has a strong internal consistency, robust convergent validity and  
4 excellent differentiation properties between known groups. We believe these characteristics,  
5 jointly with the availability of country specific reference ranges and low impact on NGO  
6 resources and time required by the patients make the PROBE questionnaire a tool with great  
7 potential for efficient PROs collection in clinical and comparative effectiveness research, and  
8 for advocacy purposes.

9 As demonstrated by factor analysis, the core of PROBE revolves around two factors,  
10 explaining the majority of the variance in responses. The most influential factor was pain,  
11 followed by use of mobility aids or assistive device (complemented by work or school absent  
12 days), and comorbidity. No surprise these three elements explain 50% of the variance among  
13 different participants: the novelty of PROBE is summarizing the assessment of these 3  
14 domains in a lightweight set of questions for which excellent internal consistency was  
15 demonstrated.

16 The convergent validity analysis showed moderate to strong correlation between PROBE and  
17 EQ-5D-5L items, with lower correlations for items concerning pain ( $r$  ranged from 0.39 to  
18 0.57). Whereas the overall convergence with EQ-5D-5L was confirmed, and was intentionally  
19 sought to ensure maximizing external validity and efficiency for cross-disease comparisons.

20 The pain related questions in the PROBE questionnaire are related to different aspects (when  
21 the pain occurred..., if the pain interfered with any of following...) than EQ-5D-5L<sup>33</sup>. From  
22 this perspective, PROBE might be seen as a new hybrid PRO tool, sharing some properties of  
23 a generic and some of a disease specific tool. The total PROBE score has a strong correlation

1 with the utility index score of the EQ-5D-5L, both in patients ( $r=0.57$ ), and controls ( $r=0.53$ ),  
2 but explores a more specific set of subdomains.

3 The most important result of this analysis is the demonstration of the discriminative property  
4 of the PROBE questionnaire and score. In known group validity analysis, PWH had a  
5 significantly lower PROBE Score when compared to the control population (participants  
6 without hemophilia). Patients with more frequent bleeds, target joints, reduced range of  
7 motion and previous life- or limb-threatening bleeds were demonstrated with a lower PROBE  
8 score (indicating worse health status).

9 The investigators did not observe a significant difference of the total PROBE scores among  
10 severity of disease, as well as, current inhibitor status. This outcome may be confounded by  
11 bleeding phenotype and joint status. It has been shown that the presence of inhibitor has  
12 negative impact on health-related quality of life in PWH<sup>34</sup>. The regression analysis in this  
13 present study revealed that numbers of bleeding, presence of target joint(s) and limitation of  
14 range of motion of any joints, not inhibitor status, were associated with worse health status.

15 There have been studies that reported the negative health-related quality of life in hemophilia  
16 patients with inhibitor who had poor orthopedic joint score, who had acute bleeding and who  
17 had more frequent bleeding<sup>35-37</sup>. It is important to note that there are relatively a small number  
18 of patients with mild-moderate diseases (8.8% and 14.3%, respectively) and those with current  
19 inhibitors (4.1%) in this study. The association between inhibitor status and health status of  
20 PWH warrant further studies with adequate power.

21 The PROBE Project has several strengths. First, both PWH and participants without bleeding  
22 disorders were recruited, asked PRO questions meaningful to both, and derived a PROBE  
23 score applicable to both. Therefore, we were able to compare the health status across health-



1 specific conditions (hemophilia vs non-hemophilia in this study). There is a potential role for  
2 the use of the PROBE questionnaire to compare health status between PWH with any other  
3 diseases that share common features, e.g. von Willebrand disease, rheumatoid arthritis or  
4 osteoarthritis. Second, both school-aged and adult participants were included. The work or  
5 school life was assessed in the same manner. As a result, the PROBE questionnaire is valid to  
6 implement in participants in all age groups (starting at the not-yet defined age when one is  
7 able to comprehend the questionnaire). Third, the questions in the PROBE questionnaire  
8 included a standardized observation period in each question stem, generally the past 12  
9 months. This is helpful for participants to respond to each item closest to their actual health  
10 condition in a specific time frame.

11 This PROBE Project also has some limitations, the first being that responsiveness of the  
12 PROBE Score has not been validated currently. This study was conducted with a cross-  
13 sectional study design. This means participants responded to the questionnaire at a single time.  
14 Assessing responsiveness requires a more complicated and demanding study design, which  
15 will be addressed in the future. Second, the observation period in the items was up to 12  
16 months. Whereas this was chosen to maximize capturing the impact of rare events, it might  
17 introduce recall bias in some participants. Third, a ceiling effect was observed for all except  
18 one item concerning PRO, as well as, all EQ-5D-5L items. The recent study regarding floor  
19 and ceiling effects of the EQ-5D-5L in 996 English general population showed that 47.6% of  
20 respondents reported the best possible health state (ceiling effect)<sup>38</sup>. In addition, the ceiling  
21 effects ranged from 58.4% to 90.8% in the subdomains<sup>38</sup>. The floor effects in the study were  
22 relatively lower than the previous reports<sup>38</sup>, probably because sicker participants (PWH) were  
23 included

## 1 **Conclusions**

2 The psychometric properties of the PROBE questionnaire have been assessed, showing that  
3 the PROBE questionnaire has a strong internal consistency, robust convergent validity and  
4 excellent differentiation properties between known groups. When compared to EQ-5D-5L,  
5 PROBE has a moderate to strong correlation across all domains. The immediate use of the  
6 PROBE score based on these results would be in cross-sectional comparisons among different  
7 settings, e.g. those defined by different levels of access to care. The PROBE questionnaire has  
8 great potential for efficient PROs collection in clinical and comparative effectiveness  
9 research, and for advocacy purposes. Future applications of PROBE within clinical trials or in  
10 longitudinal observational studies will require preliminary demonstration of PROBE test-  
11 retest and responsiveness properties, to ensure it is sensitive to meaningful treatment or  
12 disease changes over time.

1  
2  
3 1  
4  
5 2  
6  
7 3  
8  
9 4  
10  
11 5  
12  
13 6  
14  
15 7  
16  
17 8  
18  
19 9  
20  
21 10  
22  
23 11  
24  
25 12  
26  
27 13  
28  
29 14  
30  
31 15  
32  
33 16  
34  
35 17  
36  
37 18  
38  
39 19  
40  
41 20  
42  
43 21  
44  
45 22  
46  
47 23  
48  
49  
50  
51  
52  
53  
54  
55  
56  
57  
58  
59  
60

## **List of abbreviations**

PROBE: Psychometric properties of the Patient Reported Outcomes Burdens and Experiences; EQ-5D-5L: EuroQol five dimension 5-level instrument; F:factor; EQ-VAS: EuroQol visual analog scale; PWH: people with hemophilia; HIV: Human immunodeficiency virus; HCV: hepatitis C virus; HRQoL: health-related quality of life; PRO: Patient reported outcome; ISPOR: International Society for Pharmacoeconomic and Outcomes Research; NGO: non-governmental organization; SD: standard deviation; ANOVA; analysis of variance

## **Declarations**

### **Ethics approval and consent to participate**

Ethical approval was obtained from the Hamilton Integrated Research Ethics Boards. Additional local review ethical board approval was obtained when requested by the local regulation.

Consent for publication

Not Applicable.

Availability of data and material

Not Applicable.

Competing interests

1 CC, LT, MAC have no potential conflict of interest. Investigators received grants from  
2  
3  
4  
5  
6  
7  
8  
9  
10  
11  
12  
13  
14  
15  
16  
17  
18  
19  
20  
21  
22  
23  
24  
25  
26  
27  
28  
29  
30  
31  
32  
33  
34  
35  
36  
37  
38  
39  
40  
41  
42  
43  
44  
45  
46  
47  
48  
49  
50  
51  
52  
53  
54  
55  
56  
57  
58  
59  
60

1 CC, LT, MAC have no potential conflict of interest. Investigators received grants from  
2 Baxalta, now part of Shire; Bayer; Bioverativ; CSL Behring, Novo Nordisk; Roche; and Sobi  
3 and non-financial support from the US National Hemophilia Foundation.

## 8 **Funding**

9 PROBE is an independent investigator led research project with grant / research support from:  
10 Baxalta, now part of Shire; Bayer; Bioverativ; CSL Behring; Novo Nordisk, Roche and Sobi  
11 with administrative support provided by the US National Hemophilia Foundation.

12 Acknowledgements: The PROBE investigators wish to thank the hemophilia patient  
13 organizations that have participated in the project and two anonymous reviewers for  
14 significant contribution to the quality and clarity of the final version of this manuscript,  
15 including some key methodological references.

## 16 **Authors' contributions**

17 MS, AI, RC, NF, MN, DN, BOM, DP and JS conceptualized the study. CC and LT performed  
18 data collection and statistical analysis. CC, AI, MAC and MS drafted the manuscript. All  
19 authors critically reviewed the manuscript. All authors approved the final manuscript.

## 23 **References**

1. White GC, 2nd, Rosendaal F, Aledort LM, et al. Definitions in hemophilia. Recommendation of the scientific subcommittee on factor VIII and factor IX of the scientific and standardization committee of the International Society on Thrombosis and Haemostasis. *Thromb Haemost* 2001;85(3):560.
2. Avina-Zubieta JA, Galindo-Rodriguez G, Lavalle C. Rheumatic manifestations of hematologic disorders. *Curr Opin Rheumatol* 1998;10(1):86-90.
3. McCoy HE, 3rd, Kitchens CS. Small bowel hematoma in a hemophiliac as a cause of pseudoappendicitis: diagnosis by CT imaging. *Am J Hematol* 1991;38(2):138-9.
4. Fernandez-Palazzi F, Hernandez SR, De Bosch NB, et al. Hematomas within the iliopsoas muscles in hemophilic patients: the Latin American experience. *Clin Orthop Relat Res* 1996(328):19-24.
5. Small S, Rose PE, McMillan N, et al. Haemophilia and the kidney: assessment after 11-year follow-up. *Br Med J (Clin Res Ed)* 1982;285(6355):1609-11.
6. Ljung RC. Intracranial haemorrhage in haemophilia A and B. *Br J Haematol* 2008;140(4):378-84. doi: 10.1111/j.1365-2141.2007.06949.x
7. Darby SC, Kan SW, Spooner RJ, et al. Mortality rates, life expectancy, and causes of death in people with hemophilia A or B in the United Kingdom who were not infected with HIV. *Blood* 2007;110(3):815-25. doi: 10.1182/blood-2006-10-050435
8. Rodriguez-Merchan EC. Musculoskeletal complications of hemophilia. *HSS J* 2010;6(1):37-42. doi: 10.1007/s11420-009-9140-9
9. Lobet S, Hermans C, Lambert C. Optimal management of hemophilic arthropathy and hematomas. *J Blood Med* 2014;5:207-18. doi: 10.2147/JBM.S50644
10. Mazepa MA, Monahan PE, Baker JR, et al. Men with severe hemophilia in the United States: birth cohort analysis of a large national database. *Blood* 2016;127(24):3073-81. doi: 10.1182/blood-2015-10-675140
11. Tagliaferri A, Di Perna C, Santoro C, et al. Cancers in patients with hemophilia: a retrospective study from the Italian Association of Hemophilia Centers. *J Thromb Haemost* 2012;10(1):90-5. doi: 10.1111/j.1538-7836.2011.04566.x
12. Kulkarni R, Soucie JM, Evatt BL, et al. Prevalence and risk factors for heart disease among males with hemophilia. *Am J Hematol* 2005;79(1):36-42. doi: 10.1002/ajh.20339
13. Sharathkumar AA, Soucie JM, Trawinski B, et al. Prevalence and risk factors of cardiovascular disease (CVD) events among patients with haemophilia: experience of a single haemophilia treatment centre in the United States (US). *Haemophilia* 2011;17(4):597-604. doi: 10.1111/j.1365-2516.2010.02463.x
14. Ferreira AA, Leite IC, Bustamante-Teixeira MT, et al. Health-related quality of life in hemophilia: results of the Hemophilia-Specific Quality of Life Index (Haem-a-QoL) at a Brazilian blood center. *Rev Bras Hematol Hemoter* 2013;35(5):314-8. doi: 10.5581/1516-8484.20130108
15. Health USDo, Human Services FDACfDE, Research, et al. Guidance for industry: patient-reported outcome measures: use in medical product development to support labeling claims: draft guidance. *Health Qual Life Outcomes* 2006;4:79. doi: 10.1186/1477-7525-4-79
16. Deshpande PR, Rajan S, Sudeepthi BL, et al. Patient-reported outcomes: A new era in clinical research. *Perspect Clin Res* 2011;2(4):137-44. doi: 10.4103/2229-3485.86879
17. Lowe MM, Blaser DA, Cone L, et al. Increasing Patient Involvement in Drug Development. *Value Health* 2016;19(6):869-78. doi: 10.1016/j.jval.2016.04.009
18. Hoos A, Anderson J, Boutin M, et al. Partnering With Patients in the Development and Lifecycle of Medicines: A Call for Action. *Ther Innov Regul Sci* 2015;49(6):929-39. doi: 10.1177/2168479015580384
19. Skinner MW. WFH: closing the global gap--achieving optimal care. *Haemophilia* 2012;18 Suppl 4:1-12. doi: 10.1111/j.1365-2516.2012.02822.x

- 1 20. Noone D, O'Mahony B, van Dijk JP, et al. A survey of the outcome of prophylaxis, on-demand  
2 treatment or combined treatment in 18-35-year old men with severe haemophilia in six  
3 countries. *Haemophilia* 2013;19(1):44-50. doi: 10.1111/j.1365-2516.2012.02934.x
- 4 21. Benjamin K, Vernon MK, Patrick DL, et al. Patient-Reported Outcome and Observer-Reported  
5 Outcome Assessment in Rare Disease Clinical Trials: An ISPOR COA Emerging Good Practices  
6 Task Force Report. *Value Health* 2017;20(7):838-55. doi: 10.1016/j.jval.2017.05.015
- 7 22. Skinner MW, Driessens M, Curtis R, et al. The Patient Reported Outcomes, Burdens and  
8 Experiences (PROBE) Study Phase 1 Methodology and Feasibility. *Haemophilia* 2016;22  
9 (Suppl. 4):118.
- 10 23. Skinner MW, Chai-Adisaksopha C, Curtis R, et al. The Patient Reported Outcomes, Burdens and  
11 Experiences (PROBE) Project: development and evaluation of a questionnaire assessing  
12 patient reported outcomes in people with haemophilia. *Pilot Feasibility Stud* 2018;4:58. doi:  
13 10.1186/s40814-018-0253-0
- 14 24. EuroQol G. EuroQol--a new facility for the measurement of health-related quality of life. *Health*  
15 *Policy* 1990;16(3):199-208.
- 16 25. Dyer JS, Rarin RK. Measurable multiattribute value functions. *Oper Res* 1979;27: 810 - 22.
- 17 26. Kirkwood CW. Strategic Decision Making: Multiobjective Decision Analysis with Spreadsheets  
18 Belmont, CA: Wadsworth Publ. Co 1996.
- 19 27. Terwee CB, Bot SD, de Boer MR, et al. Quality criteria were proposed for measurement properties  
20 of health status questionnaires. *J Clin Epidemiol* 2007;60(1):34-42. doi:  
21 10.1016/j.jclinepi.2006.03.012
- 22 28. Chai-Adisaksopha C, Iorio A, Curtis R, et al. Test-Retest Reliability Analysis of The Patient Reported  
23 Outcomes Burdens and Experiences (PROBE) Study. *Haemophilia* 2017;23 (Suppl.2):29-140.  
24 [abstract P037]. doi: 10.1302/0301-620X.92B8.23922
- 25 29. Cronbach LJ, Warrington WG. Time-limit tests: estimating their reliability and degree of speeding.  
26 *Psychometrika* 1951;16(2):167-88.
- 27 30. Hoots WK, Ebbesen LS, Konkle BA, et al. Secondary prophylaxis with recombinant activated factor  
28 VII improves health-related quality of life of haemophilia patients with inhibitors.  
29 *Haemophilia* 2008;14(3):466-75. doi: 10.1111/j.1365-2516.2008.01654.x
- 30 31. Evans JD. Straightforward statistics for the behavioral sciences. Pacific Grove, CA: Brooks/Cole  
31 Publishing. 1996.
- 32 32. Tabachnick BG, Fidell LS. Using multivariate statistics. Boston, MA: Allyn & Bacon 2007.
- 33 33. Herdman M, Gudex C, Lloyd A, et al. Development and preliminary testing of the new five-level  
34 version of EQ-5D (EQ-5D-5L). *Qual Life Res* 2011;20(10):1727-36. doi: 10.1007/s11136-011-  
35 9903-x
- 36 34. McLaughlin JM, Munn JE, Anderson TL, et al. Predictors of quality of life among adolescents and  
37 young adults with a bleeding disorder. *Health Qual Life Outcomes* 2017;15(1):67. doi:  
38 10.1186/s12955-017-0643-7
- 39 35. Brown TM, Lee WC, Joshi AV, et al. Health-related quality of life and productivity impact in  
40 haemophilia patients with inhibitors. *Haemophilia* 2009;15(4):911-7. doi: 10.1111/j.1365-  
41 2516.2009.02032.x
- 42 36. Recht M, Neufeld EJ, Sharma VR, et al. Impact of acute bleeding on daily activities of patients with  
43 congenital hemophilia with inhibitors and their caregivers and families: observations from  
44 the Dosing Observational Study in Hemophilia (DOSE). *Value Health* 2014;17(6):744-8. doi:  
45 10.1016/j.jval.2014.07.003
- 46 37. Scalone L, Mantovani LG, Mannucci PM, et al. Quality of life is associated to the orthopaedic  
47 status in haemophilic patients with inhibitors. *Haemophilia* 2006;12(2):154-62. doi:  
48 10.1111/j.1365-2516.2006.01204.x

- 1  
2  
3 1 38. Feng Y, Devlin N, Herdman M. Assessing the health of the general population in England: how do  
4 2 the three- and five-level versions of EQ-5D compare? *Health Qual Life Outcomes*  
5 3 2015;13:171. doi: 10.1186/s12955-015-0356-8  
6  
7 4  
8  
9  
10 5  
11  
12 6  
13  
14 7  
15  
16  
17 8  
18  
19 9  
20  
21  
22 10  
23  
24 11  
25  
26  
27 12  
28  
29 13  
30  
31 14  
32  
33  
34 15  
35  
36  
37 16  
38  
39 17  
40  
41 18  
42  
43  
44 19  
45  
46  
47 20  
48  
49 21  
50  
51 22  
52  
53  
54 23  
55  
56  
57  
58  
59  
60

1  
2  
3  
4  
5  
6  
7  
8  
9  
10  
11  
12  
13  
14  
15  
16  
17  
18  
19  
20  
21  
22  
23  
24  
25  
26  
27  
28  
29  
30  
31  
32  
33  
34  
35  
36  
37  
38  
39  
40  
41  
42  
43  
44  
45  
46  
47  
48  
49  
50  
51  
52  
53  
54  
55  
56  
57  
58  
59  
60

1 Figure legends

2

3 Figure 1 Flow diagram of participant selection

4

5

6

7

8

9

10

11

12

13

14

15

16

17

18

19

20

21

22

23

24

25

26

27

28

29

30

31

32

33

34

35

36

37

38

39

40

41

42

43

44

45

46

23 Table 1. Participants' characteristics

For peer review only



| Characteristics                                              | Participants<br>(n=916)# |
|--------------------------------------------------------------|--------------------------|
| Age, median (Q1, Q3)                                         | 37 (27, 48)              |
| Diagnosis, n (%)                                             |                          |
| • Hemophilia A                                               | 532 (58.1)               |
| • Hemophilia B                                               | 82 (8.9)                 |
| • Non-hemophilia                                             | 302 (33.0)               |
| Severity of hemophilia*, n (%)                               |                          |
| • Normal                                                     | 3 (0.6)                  |
| • Mild                                                       | 54 (10.6)                |
| • Moderate                                                   | 88 (17.3)                |
| • Severe                                                     | 352 (69.3)               |
| • Do not know                                                | 11 (2.2)                 |
| Ever been diagnosed with inhibitor*, n (%)                   |                          |
| • Yes                                                        | 70 (14.1)                |
| • No                                                         | 384 (77.2)               |
| • Do not know                                                | 43 (8.7)                 |
| Currently have an clinically significant inhibitor,<br>n (%) | 24 (2.6)                 |
| Sex, n (%)                                                   |                          |
| • Male                                                       | 685 (74.8)               |
| • Female                                                     | 231 (25.2)               |
| Age when started school, median (Q1, Q3)                     | 6 (5, 6)                 |
| Year of school or education, median (Q1, Q3)                 | 15 (12, 18)              |
| Married or long-term relationship, n (%)                     | 581 (69.0)               |
| Having Children, n (%)                                       | 462 (55.3)               |
| Region, n (%)                                                |                          |
| Africa                                                       | 8 (0.9)                  |
| Western Pacific                                              | 216 (23.6)               |
| South America                                                | 343 (37.4)               |
| North America                                                | 138 (15.1)               |
| Europe                                                       | 211 (23.0)               |

1 # after exclusion of 3 possible duplicates

2 \*hemophilia population

3 Abbreviations: Q1; the first quartile, Q3; the third quartile

4

1 Table 2. Item distribution and missing data

| Item                                     | Floor (%) | Ceiling (%) | Missing (%) |
|------------------------------------------|-----------|-------------|-------------|
| Patient reported outcome                 |           |             |             |
| Q.8 Problem related to health*           | 59.1      | 32.3        | 8.6         |
| Q.9 Mobility aids or assistive devices   | 0.1       | 0           | 11.5        |
| Q.10 Pain medications                    | 3.0       | 14.6        | 12.3        |
| Q.11.1 Acute pain (activities)           | 0.7       | 33.1        | 12.8        |
| Q.11.2 Acute pain (interference)         | 0.3       | 33.2        | 12.8        |
| Q.12.1 Chronic pain (activities)         | 1.4       | 32.6        | 13.5        |
| Q.12.2 Chronic pain (interference)       | 0.1       | 33.6        | 13.5        |
| Q.13 Daily activities                    | 0.1       | 42.4        | 14.3        |
| Q.14 Work/school life                    | 0.1       | 27.8        | 21.8        |
| Q.15 Joint surgery or procedure          | 1.3       | 52.4        | 17.0        |
| Q.16 Comorbid diseases                   | 0         | 56.1        | 0           |
| Hemophilia related health                |           |             |             |
| Q.17 Severity                            | N/A       | N/A         | 17.3        |
| Q.18 Inhibitor status                    | N/A       | N/A         | 19.1        |
| Q.19 Bleeding in the past 12 months      | 16.6      | 8.5         | 18.2        |
| Q.20 Bleeding in the past 2 weeks        | N/A       | N/A         | 18.9        |
| Q.21 Hemophilia treatment center         | N/A       | N/A         | 19.4        |
| Q.25 Target joints                       | N/A       | N/A         | 22.6        |
| Q. 26 spontaneous bleeding               | N/A       | N/A         | 49.4        |
| Q.27 Limitation of range of motion*      | 66.6      | 11.4        | 22.0        |
| Q.28 Life- or limb-threatening bleeding* | 15.2      | 62.1        | 22.8        |
| EQ-5D-5L and EQ-VAS                      |           |             |             |
| Mobility                                 | 1.1       | 32.4        | 21.6        |
| Self-care                                | 0.7       | 55.0        | 22.3        |
| Usual activities                         | 0.7       | 37.9        | 22.4        |
| Pain/discomfort                          | 1.1       | 23.9        | 22.9        |
| Anxiety/depression                       | 1.6       | 37.3        | 22.8        |
| VAS                                      | 0         | 3.1         | 22.8        |

2 \*dichotomous outcome

3 N/A: not applicable

4

1 Table 3. Principal axis factor analysis, non-orthogonal rotated structure matrix loadings

| Items                                  | Factor1       | Factor2       | Factor3       | Uniqueness |
|----------------------------------------|---------------|---------------|---------------|------------|
| Q.8 Problem related to health          | 0.1053        | 0.1416        | 0.0277        | 0.7022     |
| Q.9 Mobility aids or assistive devices | -0.1540       | 0.0442        | 0.3470        | 0.7427     |
| Q.10 Pain medications                  | 0.2065        | 0.0684        | 0.1394        | 0.6174     |
| Q.11.1 Acute pain (activities)         | -0.0033       | <b>0.7963</b> | 0.0158        | 0.3111     |
| Q.11.2 Acute pain (interference)       | 0.0763        | <b>0.7701</b> | 0.0005        | 0.2900     |
| Q.12.1 Chronic pain (activities)       | <b>0.8214</b> | 0.0386        | 0.0329        | 0.2128     |
| Q.12.2 Chronic pain (interference)     | <b>0.8315</b> | 0.0152        | 0.0092        | 0.1969     |
| Q.13 Daily activities                  | 0.2573        | 0.0229        | <b>0.5321</b> | 0.3854     |
| Q.14 Work/school life                  | 0.0679        | 0.0477        | <b>0.5931</b> | 0.6613     |
| Q.15 Joint surgery or procedure        | 0.0489        | 0.0222        | -0.0031       | 0.8356     |
| Q.16 Comorbid diseases                 | -0.0022       | -0.0832       | 0.0642        | 0.7874     |

2

3

4 Table 4. Correlations between PROBE and EQ-5D-5L items (convergent validity)

| EQ-5D-5L            | PROBE                              | Correlation | 95% confidence interval |
|---------------------|------------------------------------|-------------|-------------------------|
| Mobility            | Q.9 Mobility aids                  | 0.42        | 0.35-0.47               |
| Pain and discomfort | Q.10 Pain medications              | 0.55        | 0.50-0.60               |
|                     | Q.11.1 Acute pain (activities)     | 0.42        | 0.36-0.48               |
|                     | Q.11.2 Acute pain (interference)   | 0.39        | 0.32-0.45               |
|                     | Q.12.1 Chronic pain (activities)   | 0.56        | 0.51-0.61               |
|                     | Q.12.2 Chronic pain (interference) | 0.57        | 0.52-0.62               |
| Self-care           | Q.13 Activities of daily living    | 0.65        | 0.61-0.69               |
| Usual activities    | Q.13 Activities of daily living    | 0.71        | 0.67-0.74               |
| Anxiety             | N/A                                | N/A         | N/A                     |
| Utility index score | Total score                        | 0.67        | 0.62-0.71               |

5 Abbreviation: N/A; not applicable

6

1 Table 5. Known group validity analyses, univariate analysis

| Subgroup                                                                                                                                                                                                                                                      | Total PROBE score, mean (SD)                                                                                         | p-value |
|---------------------------------------------------------------------------------------------------------------------------------------------------------------------------------------------------------------------------------------------------------------|----------------------------------------------------------------------------------------------------------------------|---------|
| Q.2 Diagnosis <ul style="list-style-type: none"> <li>• Non-hemophilia</li> <li>• Hemophilia</li> </ul>                                                                                                                                                        | 0.87 (0.11)<br>0.71 (0.16)                                                                                           | <0.001  |
| Q.17 Severity of hemophilia <ul style="list-style-type: none"> <li>• Mild-moderate</li> <li>• Severe</li> </ul>                                                                                                                                               | 0.71 (0.16)<br>0.70 (0.16)                                                                                           | 0.45    |
| Q.18 Current inhibitor <ul style="list-style-type: none"> <li>• No</li> <li>• Yes</li> </ul>                                                                                                                                                                  | 0.71 (0.19)<br>0.67 (0.12)                                                                                           | 0.35    |
| Q.19 Number of bleeds in past year <ul style="list-style-type: none"> <li>• 0 bleed</li> <li>• 1 bleed</li> <li>• 2-3 bleeds</li> <li>• 4-7 bleeds</li> <li>• 8-10 bleeds</li> <li>• 11-15 bleeds</li> <li>• 16-30 bleeds</li> <li>• &gt;30 bleeds</li> </ul> | 0.80 (0.14)<br>0.85 (0.11)<br>0.75 (0.15)<br>0.74 (0.14)<br>0.70 (0.13)<br>0.68 (0.12)<br>0.65 (0.15)<br>0.61 (0.15) | <0.001  |
| Q.20 Bleed in the past two weeks <ul style="list-style-type: none"> <li>• No</li> <li>• Yes</li> </ul>                                                                                                                                                        | 0.76 (0.15)<br>0.67 (0.15)                                                                                           | <0.001  |
| Q.25 Target joint <ul style="list-style-type: none"> <li>• No</li> <li>• Yes</li> </ul>                                                                                                                                                                       | 0.78 (0.16)<br>0.68 (0.15)                                                                                           | <0.001  |
| Q.26 Spontaneous joint bleeding <ul style="list-style-type: none"> <li>• No</li> <li>• Yes</li> </ul>                                                                                                                                                         | 0.73 (0.15)<br>0.66 (0.14)                                                                                           | 0.0004  |
| Q.27 having reduced range of motion <ul style="list-style-type: none"> <li>• No</li> <li>• Yes</li> </ul>                                                                                                                                                     | 0.86 (0.13)<br>0.68 (0.14)                                                                                           | <0.001  |
| Q.28 Life threatening bleed <ul style="list-style-type: none"> <li>• No</li> <li>• Yes</li> </ul>                                                                                                                                                             | 0.72 (0.15)<br>0.62 (0.16)                                                                                           | <0.001  |

2

3

1 Table 6. Coefficients derived from multivariable linear regression analysis

|                                     | Coefficient* | 95% confidence interval | p-value |
|-------------------------------------|--------------|-------------------------|---------|
| Q.2 Diagnosis                       |              |                         |         |
| • Non-hemophilia                    | Control      | N/A                     | N/A     |
| • hemophilia                        | -0.22        | -0.25 to -0.18          | <0.001  |
| Q.17 Severity of hemophilia         |              |                         |         |
| • Mild-Moderate                     | Control      | N/A                     | N/A     |
| • Severe                            | -0.003       | -0.03 to 0.03           | 0.83    |
| Q.18 Current inhibitor              |              |                         |         |
| • No                                | Control      | N/A                     | N/A     |
| • Yes                               | -0.04        | -0.14 to 0.05           | 0.34    |
| Q.19 Number of bleeds in past year  |              |                         |         |
| • 0 bleed                           | Control      | N/A                     | N/A     |
| • 1 bleed                           | 0.04         | -0.03 to 0.10           | 0.29    |
| • 2-3 bleeds                        | -0.06        | -0.11 to 0.001          | 0.06    |
| • 4-7 bleeds                        | -0.07        | -0.12 to -0.01          | 0.02    |
| • 8-10 bleeds                       | -0.10        | -0.16 to -0.03          | 0.002   |
| • 11-15 bleeds                      | -0.14        | -0.20 to 0.08           | <0.001  |
| • 16-30 bleeds                      | -0.15        | -0.21 to -0.09          | <0.001  |
| • >30 bleeds                        | -0.19        | -0.24 to -0.13          | <0.001  |
| Q.20 Bleed in the past two weeks    |              |                         |         |
| • No                                | Control      | N/A                     | N/A     |
| • Yes                               | -0.09        | -0.12 to -0.07          | <0.001  |
| Q.25 Target joint                   |              |                         |         |
| • No                                | Control      | N/A                     | N/A     |
| • Yes                               | -0.09        | -0.13 to -0.06          | <0.001  |
| Q.26 Spontaneous joint bleeding     |              |                         |         |
| • No                                | Control      | N/A                     | N/A     |
| • Yes                               | -0.09        | -0.12 to -0.05          | <0.001  |
| Q.27 having reduced range of motion |              |                         |         |
| • No                                | Control      | N/A                     | N/A     |
| • Yes                               | -0.14        | -0.19 to -0.11          | <0.001  |
| Q.28 Life threatening bleed         |              |                         |         |
| • No                                | Control      | N/A                     | N/A     |
| • Yes                               | -0.10        | -0.13 to -0.06          | <0.001  |

2 \*Adjusted from age and sex

3 Abbreviation: N/A; not applicable

4

1  
2  
3  
4  
5  
6  
7  
8  
9  
10  
11  
12  
13  
14  
15  
16  
17  
18  
19  
20  
21  
22  
23  
24  
25  
26  
27  
28  
29  
30  
31  
32  
33  
34  
35  
36  
37  
38  
39  
40  
41  
42  
43  
44  
45  
46  
47  
48  
49  
50  
51  
52  
53  
54  
55  
56  
57  
58  
59  
60

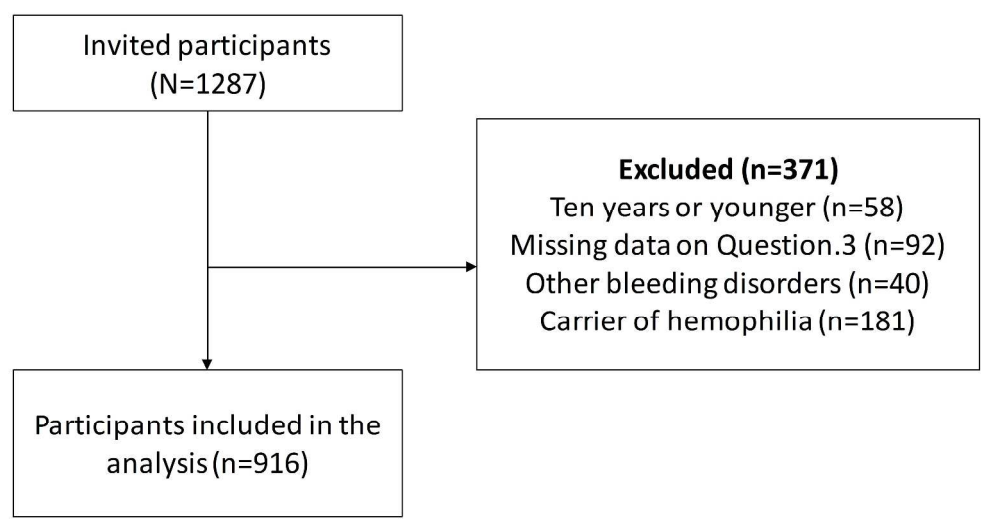

Figure 1 Flow diagram

er review only
